# Supplementary material
Source: publisher figshare collection journal article supplement (https://gsajournals.figshare.com/ndownloader/files/21699561)
Supplement: Supplementary file 1 [file 21699561]

## Sheet: genotype data
Note:	1=A (G.hirsutum homozygous) 2=B G.mustelinum homozygous 3=H (heterozygous) 4=C (not 1) 5=D (not 2) 0=- (missing data)
Order	Markers	Chromosomes	IL1	IL2	IL3	IL4	IL5	IL6	IL7	IL8	IL9	IL11	IL12	IL13	IL14	IL15	IL16	IL17	IL18	IL19	IL20	IL21	IL22	IL23	IL24	IL25	IL26	IL27	IL28	IL29	IL30	IL31	IL32	IL33	IL35	IL36	IL37	IL38	IL39	IL40	IL41	IL42	IL43	IL44	IL45	IL46	IL47	IL48	IL49
1	NAU4045a	Chr01	3	1	3	1	3	1	3	3	1	3	3	3	1	1	3	1	3	0	1	1	2	1	1	2	1	3	3	1	2	3	3	3	1	3	3	1	1	3	1	3	3	1	3	1	3	2	3
2	BNL3580	Chr01	1	1	1	1	1	3	1	3	1	1	1	1	1	2	1	3	1	1	1	1	1	1	1	1	1	1	1	1	1	1	1	1	1	1	1	1	1	1	1	1	1	1	3	1	1	1	1
3	NAU5107	Chr01	1	1	1	1	1	3	1	1	1	1	1	1	3	1	1	3	1	1	1	1	1	1	1	1	1	1	1	1	1	1	1	1	1	1	1	1	1	1	1	1	1	3	1	2	1	1	2
4	NAU4073	Chr01	2	5	5	5	2	5	5	2	2	5	2	2	5	5	5	2	5	5	0	0	5	5	5	5	5	2	5	5	2	5	5	5	2	5	5	2	2	5	5	5	2	5	2	0	5	2	2
5	BNL1667	Chr01	1	1	1	1	1	3	1	2	2	1	1	1	1	1	1	2	1	1	1	1	1	1	1	1	1	1	1	1	1	1	1	1	1	1	1	1	1	1	1	1	1	2	1	1	1	1	1
6	DPL0094	Chr01	1	1	1	1	1	2	1	1	1	0	1	1	1	1	1	1	1	1	1	1	1	1	1	1	1	1	1	1	1	1	1	1	1	1	1	1	1	1	1	1	1	1	1	1	1	1	1
7	CICR333	Chr01	1	1	1	1	1	1	1	1	1	1	1	1	1	1	1	1	1	1	1	1	1	1	1	1	1	1	1	1	1	1	1	1	1	1	1	3	3	1	1	1	1	1	1	1	1	1	3
8	MUSB0596	Chr01	1	1	1	1	1	1	1	1	1	1	1	1	1	1	1	1	1	1	1	1	1	1	1	1	1	1	1	1	1	1	1	1	1	1	1	1	1	1	1	1	1	1	1	3	1	1	1
9	NTU237	Chr01	1	1	1	0	1	1	1	1	1	1	1	1	3	1	1	1	1	1	1	1	1	1	1	1	1	1	1	1	1	1	1	1	1	1	1	3	3	0	1	1	1	1	1	1	1	1	1
10	NAU3690	Chr01	1	1	1	1	1	1	1	1	1	1	1	1	4	1	1	1	1	1	1	1	1	1	1	1	1	0	1	1	1	1	1	1	1	1	1	4	4	1	1	1	1	1	0	1	1	1	1
11	MUB1035b	Chr01	5	5	5	5	5	5	5	5	5	5	5	5	5	5	5	5	5	5	5	5	5	5	5	5	5	5	5	5	5	5	5	5	5	5	5	5	2	5	5	5	5	5	5	5	5	5	5
12	CICR123	Chr01	1	1	0	1	0	0	1	1	1	1	1	1	1	1	1	1	1	0	0	1	1	1	0	0	1	1	1	1	1	1	1	1	1	1	1	1	1	1	1	1	1	1	1	4	1	1	1
13	CICR105	Chr01	1	1	1	1	1	1	1	1	1	1	1	1	1	1	1	1	1	1	1	1	1	1	1	1	1	1	1	2	1	1	1	1	1	1	1	1	1	1	1	1	1	1	2	1	1	2	1
14	NAU2095	Chr01	1	1	1	1	1	1	1	1	1	1	1	1	1	1	1	1	1	1	1	1	1	1	1	1	1	1	1	1	1	1	1	1	1	1	1	1	2	1	1	1	0	1	1	1	1	1	1
15	MUSS085	Chr01	1	1	1	0	1	1	1	1	1	3	1	1	1	1	1	1	1	1	0	1	1	1	1	1	1	1	1	3	1	1	1	1	0	1	1	1	1	0	1	3	1	1	1	1	1	3	0
16	CIR009	Chr01	1	1	1	1	1	1	1	1	1	1	1	1	1	1	1	1	1	1	1	1	1	2	3	1	1	1	1	2	1	1	1	1	2	1	1	2	1	1	1	2	1	1	1	1	1	2	1
17	CICR21	Chr02	1	3	3	3	3	3	2	1	1	1	1	2	2	2	3	1	1	1	1	1	1	1	1	1	1	1	1	2	3	1	1	1	2	1	1	1	1	1	1	2	1	3	1	2	1	2	1
18	NAU5499	Chr02	2	2	1	2	2	1	2	1	1	3	2	1	2	1	1	1	1	2	1	1	1	1	1	1	1	1	1	0	2	1	1	2	1	2	1	1	1	0	3	2	1	1	3	3	2	1	1
19	BNL3972	Chr02	1	1	1	1	1	1	1	1	1	1	1	1	1	1	1	1	1	1	1	1	1	1	1	1	1	1	1	1	1	1	1	1	1	1	1	1	1	1	1	1	1	1	1	1	1	1	1
20	BNL1434	Chr02	1	1	1	1	1	1	1	1	1	1	1	1	1	1	1	1	1	2	1	1	1	1	1	1	1	1	1	1	1	1	1	1	1	1	1	1	1	1	1	1	1	1	1	1	1	1	1
21	BNL3512	Chr02	1	1	1	1	1	1	1	1	1	1	1	1	1	1	1	1	1	1	1	1	1	1	1	1	1	1	1	1	1	1	1	1	3	1	1	1	1	1	1	1	1	1	1	1	1	1	1
22	CICR015	Chr02	1	1	1	1	1	2	1	1	1	1	1	1	1	1	1	1	1	1	1	1	1	1	1	1	1	0	1	1	0	1	1	1	1	1	1	1	1	0	1	1	1	1	1	1	1	1	1
23	CICR004	Chr02	1	1	1	1	1	1	1	1	0	1	1	1	1	1	1	1	1	1	1	1	1	1	1	1	1	1	1	1	1	3	0	1	1	1	1	1	1	1	1	1	1	1	1	1	1	0	1
24	CICR012	Chr02	1	1	1	1	1	3	1	1	1	1	1	3	3	1	0	1	3	1	1	1	1	0	0	1	1	1	1	1	1	1	0	1	1	1	1	3	3	0	0	1	1	1	1	3	3	3	1
25	NTU235	Chr02	2	2	2	2	2	1	2	2	2	2	2	2	2	2	2	2	2	2	2	2	2	2	2	2	2	2	2	2	2	2	2	1	1	2	2	2	1	2	2	2	2	1	2	1	2	1	1
26	CICR88	Chr02	2	1	2	2	2	1	2	1	1	1	2	1	2	1	1	1	1	2	1	1	1	2	1	2	1	1	1	2	1	1	2	1	1	2	2	1	1	1	1	2	1	1	2	1	2	1	1
27	CICR34	Chr03	1	1	1	1	1	1	1	1	1	1	1	1	3	1	1	1	1	1	1	1	1	1	1	1	1	1	1	3	1	1	1	1	1	1	1	1	1	1	1	1	1	1	1	1	1	1	1
28	NAU3427	Chr03	5	2	5	5	5	5	5	5	5	2	2	5	5	5	5	5	5	2	5	5	2	5	2	5	2	5	2	5	5	2	2	2	2	2	5	2	2	2	5	5	5	5	5	5	2	2	5
29	NAU5443b	Chr03	1	1	1	4	1	1	1	1	1	1	4	1	1	4	4	1	1	1	1	1	1	1	1	1	1	1	1	1	1	1	4	1	4	4	1	1	1	1	4	1	4	1	4	1	1	1	1
30	BNL3441	Chr03	1	1	1	1	1	3	1	1	1	1	1	1	1	1	1	1	1	1	1	1	1	1	1	1	1	1	1	1	1	1	1	1	1	1	1	1	1	1	1	1	1	1	1	1	1	1	1
31	MUSS207	Chr03	1	1	1	1	1	1	1	1	1	1	1	1	1	1	1	4	1	1	1	1	1	1	1	1	1	1	1	1	1	1	1	1	1	1	1	1	1	1	1	1	1	1	1	1	1	1	4
32	BNL3267	Chr03	1	1	1	1	1	1	1	2	2	1	1	1	1	1	1	2	1	1	1	1	1	1	1	1	1	1	1	1	1	1	1	1	1	1	1	2	2	1	1	1	1	1	1	1	1	1	1
33	CICR222	Chr03	2	3	1	2	3	1	2	2	2	1	2	2	1	2	2	2	1	2	2	2	2	1	1	1	2	1	2	1	1	2	1	3	3	2	1	1	1	3	3	2	1	3	1	1	2	2	1
34	CICR437	Chr03	2	3	1	2	1	1	2	2	2	1	3	2	1	2	1	2	1	2	1	2	2	1	1	1	2	1	2	1	1	2	1	2	1	2	1	1	1	1	3	2	1	3	3	1	3	1	0
35	CICR597	Chr03	0	0	0	0	0	0	1	1	1	2	1	1	1	2	0	1	1	1	1	1	1	1	1	1	1	1	1	1	2	1	1	1	1	0	1	1	1	1	1	1	1	1	1	0	1	2	2
36	DPL0605	Chr03	1	1	1	1	1	1	1	1	1	3	1	1	1	1	1	1	1	1	1	1	1	1	1	1	1	1	1	1	1	1	1	1	3	1	1	1	1	1	1	1	1	1	1	1	1	1	1
37	DPL0354	Chr03	1	1	1	0	1	1	1	1	1	1	1	1	3	1	1	1	1	1	0	1	1	1	2	1	1	1	1	1	1	1	1	1	1	1	1	1	1	1	1	1	1	1	1	1	1	1	1
38	NAU2190	Chr03	2	3	2	3	3	1	1	1	1	1	1	1	1	2	1	1	3	2	2	1	1	2	1	1	1	1	1	3	1	1	3	1	1	1	2	1	1	1	1	1	1	1	1	1	2	1	1
39	BNL3259a	Chr03	4	1	1	1	1	1	1	1	4	1	4	1	1	1	1	1	1	1	1	4	1	1	4	1	4	1	1	1	1	1	1	1	1	1	1	1	1	4	1	1	1	4	1	1	1	1	1
40	CICR149	Chr03	1	1	1	1	1	1	1	1	1	1	1	1	1	1	1	1	1	1	1	1	1	2	1	1	1	1	1	0	2	1	1	1	2	1	1	1	1	1	1	1	1	1	1	1	1	2	1
41	NAU862a	Chr03	5	5	5	0	5	2	5	5	5	5	5	5	5	5	5	5	5	5	0	5	5	5	2	5	5	5	5	5	5	5	5	5	0	5	5	5	5	5	0	5	5	5	5	2	5	5	5
42	CICR760	Chr03	0	1	1	0	1	1	1	1	1	3	1	1	1	1	1	1	1	1	0	1	1	1	3	1	1	1	1	3	1	1	1	1	3	1	1	3	3	1	1	1	1	1	1	1	1	3	3
43	BNL3535b	Chr04	1	1	1	4	1	4	1	1	4	1	1	4	1	1	1	4	1	1	1	1	4	4	1	1	1	1	4	4	1	1	1	4	1	4	4	4	1	1	4	4	4	1	4	4	4	4	4
44	DPL0085	Chr04	1	1	1	1	1	2	1	1	0	2	1	1	1	1	1	2	1	1	1	1	1	1	1	2	2	1	1	1	2	1	1	1	1	1	1	1	1	1	1	1	1	1	1	2	1	1	1
45	BNL530	Chr04	1	1	4	1	1	1	1	4	4	1	1	1	4	1	1	1	1	1	1	1	1	1	1	1	1	1	1	1	1	1	4	4	1	1	1	1	1	1	1	1	1	1	1	4	1	4	1
46	DPL0667	Chr04	1	1	1	1	1	3	1	1	1	3	1	1	1	1	1	2	1	1	1	1	1	0	1	1	1	1	1	1	2	1	0	0	1	1	1	1	1	1	1	1	1	0	1	1	1	1	1
47	CICR832	Chr04	5	5	2	2	5	2	2	2	2	5	2	5	5	5	0	2	2	5	0	5	5	2	2	5	5	2	5	5	2	5	5	2	2	2	2	2	5	5	2	2	2	5	2	2	2	2	2
48	DPL0494	Chr04	1	1	1	1	1	3	1	2	2	1	1	1	1	1	1	2	1	1	1	1	1	1	1	1	1	1	1	1	2	1	1	1	1	1	1	1	1	1	1	1	1	1	1	2	1	1	1
49	NAU3437	Chr04	1	1	1	0	1	1	1	1	1	0	1	1	1	1	1	1	1	1	1	1	1	1	1	1	1	2	1	1	1	1	1	1	1	1	1	1	1	0	1	0	1	1	1	1	1	1	1
50	CICR267	Chr04	1	1	1	1	1	1	1	1	1	1	1	1	1	1	1	1	1	1	1	1	1	1	1	1	1	2	1	1	1	1	1	1	1	1	1	1	1	1	1	1	0	1	1	1	1	3	1
51	NAU1151	Chr04	1	1	1	0	1	1	1	1	1	1	1	1	1	1	1	1	1	1	1	1	1	1	1	1	1	4	1	1	1	1	0	1	1	1	1	1	1	1	4	1	1	1	1	1	1	1	1
52	BNL3400	Chr05	1	1	1	1	1	1	1	1	1	1	1	1	1	1	1	1	1	1	1	1	1	1	1	3	1	2	1	1	2	1	1	1	1	1	1	3	1	1	1	3	1	3	1	1	1	1	1
53	CICR479	Chr05	1	1	1	1	1	1	1	1	1	3	1	1	1	1	1	1	1	1	1	1	1	1	2	1	1	2	1	1	2	1	1	1	1	1	1	1	1	1	1	1	1	1	1	1	1	1	1
54	TMB0835	Chr05	1	1	1	1	1	1	1	1	1	4	1	1	1	1	1	1	1	1	1	1	1	1	1	1	1	1	1	4	4	1	1	1	1	1	1	1	1	1	1	1	1	1	1	1	1	1	1
55	NAU5475	Chr05	1	1	1	1	1	1	1	1	1	1	1	1	1	1	1	1	1	1	1	1	1	1	1	1	3	1	1	1	1	1	1	1	1	1	3	1	1	1	1	1	1	1	1	1	1	1	1
56	CIR102	Chr05	1	0	1	1	1	1	1	3	1	3	1	1	3	1	1	1	2	2	2	1	1	1	1	1	1	2	1	1	1	1	2	2	1	2	1	1	1	1	1	1	3	1	1	1	1	1	1
57	CICR016	Chr05	5	5	5	0	5	5	5	2	5	5	5	5	5	5	5	5	2	5	2	2	5	5	5	5	5	2	5	5	5	5	2	2	5	2	5	5	5	5	0	5	5	5	5	5	5	5	5
58	CICR186	Chr05	1	1	1	1	1	3	1	1	1	1	1	1	1	1	1	1	1	1	1	1	1	1	1	1	1	2	1	3	1	1	1	1	1	1	1	1	1	1	1	1	1	1	1	1	1	1	1
59	DPL0241	Chr05	1	1	1	1	1	1	1	1	1	1	1	1	1	1	1	1	1	1	1	1	1	2	1	1	1	1	1	1	1	1	1	1	1	1	1	1	1	1	1	1	1	1	1	1	1	1	1
60	CICR402	Chr05	2	2	3	3	2	2	0	1	1	2	2	2	1	2	1	1	1	3	2	1	3	1	0	2	1	2	3	3	2	2	3	2	2	3	3	2	2	1	2	2	3	2	2	2	2	2	2
61	CICR847	Chr05	2	2	1	2	2	2	2	1	1	2	2	2	0	2	1	1	1	3	0	1	3	1	1	2	1	2	3	3	2	2	3	2	2	2	1	2	2	1	2	2	2	2	2	2	2	2	2
62	CICR487	Chr05	2	2	3	2	2	2	2	1	1	2	2	2	1	2	1	1	1	2	2	1	1	1	1	2	1	2	3	3	2	2	3	2	2	2	1	2	2	3	2	2	2	2	2	2	2	2	2
63	CICR403	Chr05	2	2	3	3	2	2	2	1	1	2	2	3	1	2	1	1	1	3	2	1	3	1	0	2	1	2	3	3	2	2	3	2	2	2	1	2	2	1	2	2	3	2	2	2	2	2	2
64	CICR710	Chr05	2	2	1	2	2	2	2	1	1	2	2	0	1	2	1	1	1	3	2	1	2	1	1	2	1	2	3	3	2	2	3	2	2	2	1	2	2	1	2	2	2	2	2	2	2	2	2
65	CICR690	Chr05	2	2	1	2	2	2	2	1	1	2	0	2	1	0	1	1	1	3	2	1	3	1	1	2	1	2	3	3	2	2	3	2	2	2	1	2	2	1	0	2	2	2	2	2	2	2	2
66	CICR785	Chr05	2	2	1	2	2	2	2	1	1	2	2	2	1	2	1	1	1	0	2	2	3	1	1	2	1	2	3	3	2	2	3	2	2	0	1	2	2	3	2	2	3	0	2	2	2	1	0
67	CICR529	Chr05	1	1	1	1	1	3	1	2	2	1	1	1	1	0	1	2	1	1	1	1	1	0	1	1	1	1	1	1	1	1	1	1	1	1	1	1	1	1	1	1	1	1	1	1	1	1	1
68	DPL0156	Chr05	5	5	5	5	5	5	5	2	2	5	5	5	5	5	5	2	5	5	2	5	5	5	5	5	5	5	5	5	5	5	5	5	5	5	5	2	2	5	5	5	5	5	5	5	5	2	5
69	CICR081	Chr05	5	5	5	5	5	5	5	5	5	5	5	5	5	5	5	5	5	5	5	5	5	5	5	5	5	5	5	5	5	5	5	5	5	5	5	2	2	5	5	5	5	5	5	5	5	5	5
70	BNL2656	Chr05	1	1	1	1	1	1	1	1	1	1	1	2	1	1	1	1	1	1	1	1	2	1	1	1	2	1	1	1	1	2	1	1	1	1	1	1	1	1	1	1	1	1	1	1	1	1	1
71	NAU5465	Chr05	1	1	1	1	1	1	1	1	1	1	1	1	1	1	1	1	1	1	1	1	1	1	1	3	1	1	1	1	1	1	1	1	1	1	1	1	1	1	1	1	1	1	1	1	1	1	1
72	CICR387	Chr05	1	0	1	1	1	1	1	1	1	1	1	1	1	1	1	1	1	1	1	1	1	1	1	1	1	1	1	4	1	1	1	1	1	1	1	1	0	0	0	4	1	1	1	1	0	1	1
73	NAU5099	Chr05	5	2	2	5	5	5	5	2	2	5	5	2	2	5	5	2	5	5	5	2	5	5	5	5	5	2	2	2	5	5	5	5	5	2	2	5	2	5	5	5	5	5	5	5	5	2	5
74	BNL3995	Chr05	1	1	1	1	1	1	1	1	1	1	1	1	1	1	1	1	1	1	1	1	1	1	1	1	1	1	1	1	1	1	1	1	1	1	1	1	1	1	1	1	1	1	1	1	1	1	1
75	CICR255	Chr05	1	1	1	0	1	1	1	1	1	1	1	1	1	1	1	1	1	1	1	3	2	1	1	1	2	1	3	1	1	1	1	1	1	1	1	1	2	1	1	1	1	1	1	1	1	1	1
76	CIR298	Chr06	1	1	1	1	1	1	1	1	1	1	1	1	1	1	1	1	1	1	1	1	1	1	1	1	1	1	1	1	1	1	1	1	1	1	1	2	1	1	1	1	1	1	1	1	1	1	2
77	CIR267	Chr06	1	1	1	1	1	1	1	1	1	1	1	1	1	1	1	1	1	1	1	1	1	1	1	1	1	1	1	1	1	1	1	1	1	1	1	1	1	1	1	1	1	1	1	1	1	1	1
78	CICR824	Chr06	1	1	1	1	1	1	1	1	1	1	3	3	1	1	3	0	1	1	1	1	1	1	1	0	1	1	1	1	1	1	2	1	1	2	1	1	1	1	2	1	3	1	3	1	1	1	1
79	NAU5433	Chr06	1	1	1	1	1	1	1	1	1	1	1	3	1	1	1	1	1	1	1	1	1	1	1	2	1	1	1	1	1	1	2	1	1	2	1	1	1	1	2	1	3	1	3	1	1	1	1
80	MUCS616	Chr07	1	1	1	0	1	1	1	1	1	1	1	1	3	1	1	1	1	1	0	1	1	1	1	1	1	3	1	1	1	1	1	1	1	1	1	1	1	1	0	1	1	1	1	1	1	1	1
81	NAU2002	Chr07	1	1	1	0	1	0	1	1	1	1	1	1	1	1	1	0	1	1	1	1	1	1	1	1	1	1	1	1	1	1	0	4	1	1	1	1	1	1	1	1	1	1	0	1	1	1	1
82	NAU5061	Chr07	5	5	5	5	5	5	5	5	5	5	5	5	5	5	5	5	5	5	5	5	5	5	5	5	5	5	5	5	5	5	5	5	5	5	5	5	5	0	5	5	5	5	5	5	5	5	5
83	NAU5024	Chr07	1	1	1	1	1	1	1	1	1	1	1	1	1	1	1	1	1	1	1	1	1	1	1	1	1	1	1	0	1	1	1	1	1	1	1	3	3	1	1	1	1	3	1	1	1	1	1
84	CICR003	Chr07	5	5	5	5	5	5	5	5	5	5	5	5	5	5	5	5	5	5	5	5	5	5	5	5	5	5	5	5	5	5	5	5	5	5	5	5	2	0	5	5	5	5	5	5	5	5	5
85	CICR764	Chr07	1	1	1	0	1	1	1	1	1	4	1	1	1	1	1	1	1	1	0	1	1	1	4	1	1	1	1	4	1	1	1	1	4	1	1	4	4	1	1	4	1	1	1	1	1	4	4
86	CICR106	Chr08	1	1	1	1	1	1	1	1	1	1	1	1	1	1	1	1	1	1	1	1	1	1	1	1	1	1	1	1	1	1	1	1	1	2	1	1	1	1	1	1	1	1	1	1	1	1	1
87	CIR343	Chr08	1	1	1	1	1	2	1	1	1	1	1	1	1	1	1	1	1	1	1	1	1	1	1	1	1	1	1	1	1	1	1	1	1	1	1	1	1	1	1	2	1	1	1	1	1	1	1
88	CICR492	Chr08	1	1	1	1	1	3	1	1	1	1	1	1	1	1	0	1	1	1	1	1	1	1	1	1	1	1	1	1	1	1	1	1	1	1	1	1	1	1	1	2	1	1	1	1	1	1	1
89	BNL3627	Chr08	1	1	1	1	1	1	1	1	1	1	1	1	1	1	1	1	1	1	1	1	1	1	1	1	1	1	1	1	1	1	1	1	1	1	1	1	1	1	1	2	1	1	1	1	1	1	1
90	NAU1350	Chr08	1	1	1	1	1	1	1	1	1	1	1	1	1	1	1	1	1	1	1	1	1	1	1	1	1	3	1	1	1	1	1	1	1	1	1	2	2	1	1	1	3	1	1	1	1	1	1
91	CICR306	Chr08	1	1	1	1	1	1	1	1	1	1	1	1	1	1	1	1	1	1	1	1	1	1	1	1	1	1	0	1	1	1	1	1	1	1	1	2	2	1	1	3	1	1	1	1	1	1	1
92	CICR258	Chr08	2	2	2	5	5	2	2	2	2	2	2	2	2	2	2	5	2	2	2	2	2	2	2	2	2	2	2	2	2	2	2	2	5	2	2	2	2	2	2	2	2	2	2	2	2	5	2
93	DPL0220	Chr08	1	1	3	1	1	3	1	1	1	1	2	1	1	2	3	1	1	3	1	1	1	1	1	1	3	1	1	2	2	2	2	1	1	1	2	2	2	2	3	1	2	1	2	2	2	2	2
94	DPL0646	Chr08	1	1	1	1	1	1	1	1	1	1	1	1	1	1	1	1	1	1	1	1	1	1	1	1	1	1	1	1	1	1	1	1	1	1	1	1	1	1	1	2	1	1	1	1	1	1	1
95	NTU197	Chr08	4	4	4	1	1	4	4	4	4	1	1	4	1	1	1	1	1	1	1	1	1	1	1	1	4	1	4	1	1	1	1	4	1	1	4	1	1	1	1	1	4	4	1	4	4	4	4
96	CICR368	Chr08	2	2	3	2	2	3	1	2	2	1	1	3	1	2	3	2	2	3	3	2	2	1	1	2	2	1	2	2	1	1	1	1	1	3	2	2	2	1	2	2	1	1	1	1	1	1	2
97	CICR265	Chr08	1	1	1	1	1	1	1	1	1	1	1	1	3	1	1	1	1	1	1	1	1	1	1	2	1	1	1	1	1	1	1	1	1	1	1	1	1	1	1	1	1	1	1	1	0	1	1
98	NTU196	Chr08	1	1	1	1	1	1	1	1	1	1	1	1	4	1	1	1	1	1	1	1	1	1	1	1	1	1	1	1	1	1	1	1	1	1	1	4	4	1	1	1	1	1	1	1	1	1	0
99	MUB1035a	Chr09	1	1	1	1	1	1	1	1	1	1	1	4	1	1	1	1	1	1	1	1	1	1	1	1	1	1	1	1	1	1	1	1	1	1	1	1	1	1	1	1	1	1	1	1	1	1	1
100	DPL0507	Chr09	3	1	1	1	1	1	1	1	1	3	3	1	3	1	1	1	1	1	1	1	1	1	1	1	1	1	1	1	1	1	1	1	1	1	1	1	1	1	1	1	1	1	1	1	1	1	1
101	CICR658	Chr09	2	5	5	0	5	5	5	5	5	5	5	5	2	5	0	0	5	5	5	5	5	5	5	5	5	5	5	5	5	5	5	5	5	5	5	5	5	5	5	5	5	5	5	5	0	5	5
102	BNL3779	Chr09	1	1	1	1	1	1	1	1	1	1	1	1	1	1	1	1	1	1	1	1	1	1	1	1	1	1	1	1	1	1	1	1	1	1	1	1	1	1	1	3	1	1	1	1	1	1	1
103	CICR334	Chr09	1	1	1	1	1	1	1	1	1	1	1	1	1	1	1	1	1	1	1	1	1	1	1	1	1	1	1	1	1	1	1	1	1	1	1	2	1	1	1	1	1	1	1	1	1	1	1
104	NAU5508	Chr09	1	1	1	0	4	1	4	1	1	4	4	4	1	1	1	1	1	4	0	1	1	1	4	4	1	1	1	4	4	1	1	1	4	4	1	1	4	1	4	4	4	1	4	4	1	4	1
105	BNL2847	Chr09	1	1	1	1	1	1	1	1	1	1	1	1	1	1	1	1	1	1	1	1	1	1	1	1	1	1	1	1	2	1	1	1	1	1	1	1	1	1	1	1	3	1	1	1	1	1	1
106	BNL1317a	Chr09	1	1	1	1	1	1	1	1	1	1	1	1	1	1	1	1	1	1	1	1	1	1	1	1	1	1	4	1	1	4	1	4	1	1	1	4	4	1	4	4	1	4	1	1	1	1	1
107	DPL0262b	Chr09	5	5	5	5	5	5	5	5	5	0	5	5	5	5	5	5	5	5	5	0	5	5	5	5	5	2	5	5	5	5	5	5	5	5	5	5	5	0	0	5	5	5	5	5	5	5	5
108	BNL2590	Chr09	0	1	1	1	1	1	1	1	1	0	0	1	0	0	1	0	0	0	0	0	0	0	0	0	1	0	0	1	0	1	0	0	0	1	1	1	1	1	2	1	1	1	3	1	1	1	2
109	BNL2750	Chr09	1	1	1	1	1	3	1	3	3	1	1	1	1	1	1	3	1	1	1	1	1	1	1	1	1	1	1	1	1	1	1	1	1	1	1	3	3	2	1	1	1	3	1	1	1	1	1
110	BNL1438	Chr10	1	1	1	1	1	1	1	1	3	1	1	1	1	1	1	2	1	1	1	1	1	1	1	1	1	1	1	1	1	1	1	1	3	1	1	1	1	1	1	1	1	1	1	1	1	1	2
111	CICR002a	Chr10	1	1	1	1	1	1	1	2	2	3	1	1	3	1	3	2	3	1	1	1	1	1	0	1	1	1	1	1	1	1	1	1	1	1	3	3	1	3	1	1	1	1	1	1	1	1	1
112	CICR254	Chr10	1	1	1	1	1	2	1	1	1	1	1	1	1	1	1	1	1	3	1	1	0	1	2	1	1	1	1	1	1	1	1	1	1	1	1	1	1	1	1	1	1	1	1	1	0	1	1
113	CICR194	Chr10	1	1	1	1	1	0	1	1	1	1	1	1	1	1	1	1	1	1	1	0	1	1	1	1	1	1	3	1	3	3	1	1	1	1	1	1	1	1	1	1	1	0	1	1	1	1	1
114	CICR836	Chr10	1	1	0	1	1	1	1	1	1	1	1	1	1	1	1	1	1	1	0	0	1	1	1	1	1	1	4	1	1	4	1	1	1	1	1	1	1	1	1	1	1	1	1	1	1	0	1
115	BNL3563	Chr10	1	1	1	1	1	1	1	1	1	1	1	1	1	1	1	1	1	1	1	1	1	1	1	1	1	1	1	1	1	1	1	1	1	1	1	1	1	4	1	1	1	1	1	1	4	1	1
116	BNL2960	Chr10	3	3	3	1	1	1	3	1	1	1	1	1	3	1	1	1	1	1	1	1	3	1	1	3	3	2	2	2	1	3	1	1	1	1	3	3	1	1	1	2	1	1	3	2	1	1	3
117	STV091	Chr10	1	1	1	1	1	2	1	1	1	1	1	1	1	1	1	1	2	1	1	1	1	1	1	1	1	1	1	1	1	1	1	1	1	1	1	1	1	1	1	2	1	1	1	1	1	1	1
118	CICR340a	Chr11	1	1	1	1	3	3	2	0	2	2	1	3	2	1	3	0	1	1	1	3	0	1	2	1	1	0	0	1	1	3	1	1	3	1	1	2	2	2	2	2	2	3	2	1	2	3	1
119	NTU219	Chr11	5	5	5	5	5	5	5	5	2	2	5	5	5	5	5	2	5	5	5	5	5	5	5	2	5	5	5	5	2	5	5	0	2	5	5	2	5	5	5	5	5	5	5	2	5	2	2
120	BNL3442	Chr11	2	2	2	1	2	3	2	1	1	1	2	1	2	2	2	1	2	1	2	3	1	2	2	1	2	1	3	2	1	2	2	1	1	2	2	1	1	2	2	2	2	2	2	2	2	3	1
121	CICR269	Chr11	1	1	3	3	3	0	1	2	2	1	1	2	1	1	3	2	3	3	1	1	1	0	0	0	1	2	1	1	1	0	1	1	1	1	2	2	2	0	1	1	1	1	1	1	1	1	2
122	NAU1366	Chr11	1	1	1	1	1	1	1	1	1	2	1	1	1	1	1	1	1	3	1	1	1	1	1	2	1	1	1	1	2	1	1	1	3	1	1	1	1	1	1	1	1	3	1	2	1	1	3
123	NAU3414	Chr11	1	3	1	1	1	1	1	1	1	1	1	1	1	1	1	1	1	1	3	2	1	1	1	1	1	1	1	1	1	1	1	1	1	1	1	2	2	2	3	1	1	3	3	1	2	1	1
124	NAU3695	Chr11	4	4	1	1	1	1	1	1	1	1	1	1	4	1	1	1	1	1	1	1	1	1	1	1	1	1	1	1	1	1	1	1	1	4	1	4	4	1	4	1	4	1	4	1	1	1	1
125	BNL1151	Chr11	5	5	5	5	5	5	5	5	5	5	5	5	5	5	5	5	5	5	5	5	5	5	0	2	5	5	5	5	5	5	5	5	5	5	5	5	5	5	5	5	5	5	5	5	5	5	5
126	CICR762	Chr11	1	1	1	1	1	1	1	1	1	1	1	1	1	1	1	1	1	1	1	1	1	1	1	2	1	1	1	1	1	1	1	1	1	1	1	1	1	1	1	1	1	1	1	1	1	1	1
127	MUSS161	Chr11	1	1	1	1	1	1	1	1	1	1	1	1	1	1	1	1	1	1	1	1	1	1	1	1	1	1	1	1	1	1	1	1	2	1	1	1	1	1	1	1	1	1	1	1	1	1	1
128	BNL4094	Chr11	1	1	1	1	1	1	1	1	1	0	0	1	1	1	1	1	1	1	1	1	1	1	1	1	1	1	1	1	1	1	1	1	1	1	1	1	1	0	1	1	1	1	1	1	1	1	1
129	CICR344	Chr11	1	1	1	1	1	1	1	1	1	1	3	1	1	1	1	0	1	1	1	1	1	1	3	1	1	1	1	1	1	1	1	1	1	1	1	1	1	1	1	2	1	1	1	1	1	1	1
130	DPL0253	Chr11	1	1	1	1	1	1	1	4	4	1	1	4	1	1	1	4	1	1	1	1	1	1	1	4	1	1	1	1	1	1	1	1	1	1	1	1	1	1	1	1	1	1	1	1	1	1	4
131	NTU150	Chr11	5	5	5	5	5	5	5	5	5	5	5	5	5	5	5	5	5	5	0	5	5	5	5	5	5	5	5	5	5	5	5	5	5	5	5	0	5	2	5	5	5	5	5	5	5	0	5
132	NTU210	Chr11	1	1	1	1	1	1	1	0	1	1	1	1	1	1	1	1	1	1	1	1	1	1	0	1	1	1	1	1	1	1	1	1	1	1	1	1	1	1	1	1	1	1	1	1	1	1	1
133	BNL1408	Chr11	1	1	1	1	1	1	1	1	1	1	1	4	1	1	1	1	1	1	1	1	1	1	1	1	1	1	1	1	1	1	1	1	1	1	1	1	1	1	1	1	1	1	1	1	1	1	1
134	DPL0325	Chr11	1	1	1	1	1	1	1	1	1	1	1	1	3	1	1	1	1	1	1	1	1	1	1	1	3	1	1	1	1	1	1	1	1	1	1	1	1	1	1	1	1	1	1	1	1	1	1
135	DPL0270	Chr11	1	1	1	1	1	1	1	1	1	1	1	3	1	1	1	1	1	1	1	1	1	1	1	3	1	2	1	1	1	1	1	1	1	1	1	1	1	1	1	1	1	1	1	1	1	1	1
136	BNL1552	Chr11	1	1	3	1	1	1	1	1	1	1	1	1	1	3	1	3	3	3	1	1	1	1	1	1	1	1	1	1	1	1	3	1	1	2	1	1	1	1	3	1	3	1	2	1	2	1	1
137	NAU2016	Chr11	1	1	1	1	1	1	1	1	1	1	1	1	2	1	1	1	1	1	1	1	1	1	2	1	1	1	1	1	1	3	1	2	1	1	1	1	1	2	1	1	1	1	1	1	1	1	1
138	NTU174a	Chr12	1	1	1	1	1	1	1	1	1	1	1	3	1	1	2	1	1	1	2	1	1	1	1	2	0	1	1	2	1	1	1	1	2	2	2	1	1	0	0	2	1	1	2	1	2	2	1
139	NAU1119	Chr12	1	1	1	1	1	1	1	1	1	1	1	1	1	1	1	1	1	2	1	1	1	1	1	1	1	1	1	1	1	1	1	1	1	1	1	1	1	1	1	1	1	1	1	1	1	1	0
140	NAU915	Chr12	1	1	1	1	3	3	1	1	1	1	1	1	1	1	1	1	1	1	0	1	1	1	1	1	1	1	1	3	1	1	1	1	1	1	1	1	1	1	1	1	1	1	1	1	1	1	1
141	BNL1673	Chr12	1	1	1	1	1	1	1	1	1	1	1	1	1	1	1	1	1	1	1	1	1	1	1	1	3	1	3	1	1	3	1	1	1	1	1	1	1	1	1	1	1	1	1	1	1	3	1
142	NAU943	Chr12	1	1	1	1	1	1	1	1	1	1	1	1	1	1	3	1	1	1	1	1	1	1	1	1	1	1	1	1	1	1	1	1	1	1	1	1	1	1	1	1	1	1	1	3	1	1	1
143	CICR446	Chr12	1	1	1	1	1	1	1	1	1	1	1	1	1	1	1	1	1	1	1	1	1	1	1	1	1	1	1	1	1	1	1	1	1	1	1	1	1	1	1	1	3	1	1	1	1	1	1
144	CICR024	Chr12	1	1	1	1	1	1	1	1	1	1	1	1	3	1	1	1	1	1	3	0	1	1	1	1	1	1	3	1	1	1	1	1	1	1	1	1	2	1	1	1	2	3	1	1	1	1	1
145	CICR484	Chr12	1	1	1	1	1	0	1	1	1	1	1	1	1	1	1	1	1	1	1	1	1	1	1	1	1	1	1	2	1	1	1	1	1	1	1	1	1	1	1	1	1	1	1	1	0	1	1
146	CICR384	Chr13	0	1	0	1	0	0	1	3	0	1	1	3	0	1	1	1	1	0	1	0	1	1	1	1	1	2	1	1	1	1	1	1	1	1	1	1	1	1	1	1	1	1	1	1	1	0	1
147	DPL0249b	Chr13	1	1	1	1	1	1	1	1	1	1	1	1	1	1	1	1	1	1	1	1	1	1	1	1	1	1	1	1	1	1	1	1	3	3	1	1	1	1	1	1	1	1	1	1	1	1	1
148	CIR096	Chr13	1	1	1	1	1	1	1	1	3	1	1	1	1	1	1	1	1	1	1	1	1	1	1	1	1	1	1	1	1	1	1	1	3	1	1	1	1	1	1	1	1	1	1	1	1	3	1
149	CICR844	Chr13	1	1	1	1	1	0	1	3	3	1	1	1	1	1	1	2	1	1	0	1	1	1	1	1	1	1	1	1	1	1	1	1	3	1	1	1	1	1	1	1	1	1	1	1	1	2	1
150	BNL4029	Chr13	5	5	5	5	5	5	2	5	5	5	5	5	5	5	5	5	5	5	5	5	5	5	2	5	5	2	5	5	5	5	2	5	5	5	5	5	5	2	5	5	5	5	5	5	2	5	5
151	CICR414	Chr13	1	1	1	1	1	1	1	1	1	1	1	1	1	1	1	1	1	1	1	1	1	1	1	2	1	1	1	1	1	1	1	1	1	1	1	1	1	1	1	1	1	1	1	1	1	1	1
152	CIR047	Chr14	1	1	1	1	1	1	1	1	1	1	1	2	1	1	1	1	1	1	1	1	1	1	1	1	1	1	1	1	1	1	1	1	1	1	1	1	1	1	1	1	1	1	1	1	2	1	1
153	BNL3443	Chr14	0	1	1	1	1	1	1	1	1	1	1	1	1	1	1	4	1	1	1	1	1	1	4	1	1	1	1	1	1	1	1	1	1	1	1	1	1	1	1	1	1	1	1	1	1	1	1
154	BNL1059	Chr14	1	1	1	1	1	1	1	1	1	1	0	1	1	1	1	3	1	1	1	1	1	1	1	1	1	1	1	1	1	1	1	1	0	1	1	1	1	1	1	1	1	1	1	1	1	1	1
155	NTU102	Chr14	1	1	1	1	1	1	1	1	1	1	1	1	1	1	1	1	1	1	1	1	1	1	1	1	1	1	1	1	1	1	1	1	1	1	1	1	1	1	1	1	1	3	1	2	1	1	1
156	NAU3120	Chr14	1	1	1	1	1	1	1	1	1	1	1	1	1	1	1	4	1	1	1	1	1	1	1	1	1	1	1	1	1	1	1	1	1	1	1	1	1	1	1	1	1	1	1	1	0	1	1
157	CICR453	Chr14	2	2	5	0	2	0	2	5	5	2	2	2	5	2	5	5	5	2	2	5	5	5	5	2	5	2	5	5	2	2	5	2	2	2	5	2	2	5	2	2	2	2	2	2	2	0	2
158	NAU2336	Chr14	1	1	1	1	1	1	1	1	1	1	1	1	1	1	1	3	1	1	1	1	1	1	1	1	1	1	1	1	1	1	1	1	1	1	1	1	1	1	1	1	1	1	1	1	1	1	1
159	CICR417	Chr14	1	1	1	1	1	1	1	1	1	1	1	3	1	1	1	1	1	1	1	1	1	1	1	1	1	1	0	1	1	1	1	1	1	1	1	1	1	1	1	1	1	1	1	1	1	1	1
160	BNL3259b	Chr14	1	1	1	1	1	1	1	1	1	1	1	1	1	1	1	1	1	1	1	1	1	1	1	1	1	1	1	1	1	1	1	3	1	1	2	1	1	1	2	1	1	1	1	1	1	1	1
161	CICR395	Chr14	1	1	1	1	1	1	1	1	1	2	1	2	1	0	3	1	1	1	1	1	1	0	2	1	1	1	1	1	1	1	2	3	2	1	2	1	1	2	1	2	1	3	1	3	1	1	1
162	NAU3820	Chr14	1	3	1	3	2	1	2	2	2	3	2	2	1	0	3	2	1	1	1	2	2	3	2	2	2	2	2	2	2	2	1	2	2	2	1	2	2	2	2	2	2	2	2	2	1	1	2
163	CIR084	Chr14	1	1	1	1	1	1	1	1	1	1	1	1	1	1	1	1	1	1	1	1	1	2	1	1	1	1	1	1	1	1	1	1	2	1	1	1	1	1	1	1	1	1	1	1	1	1	1
164	CICR143	Chr14	1	1	1	1	1	1	1	1	1	1	1	1	1	1	1	1	1	1	1	1	1	1	1	1	1	1	1	1	1	1	1	1	2	1	1	1	0	0	1	1	1	1	1	1	1	3	1
165	NAU862b	Chr14	1	1	1	0	1	1	1	1	1	1	1	1	1	1	1	1	1	1	0	1	1	1	1	1	1	1	1	1	1	1	1	1	2	1	1	1	0	1	1	1	1	1	1	1	1	1	1
166	NTU182	Chr14	1	1	1	1	1	1	1	1	1	1	1	4	1	4	1	1	1	1	1	1	4	1	1	1	4	1	1	4	4	1	1	1	4	4	1	1	1	1	1	1	1	1	1	1	1	1	1
167	CICR786	Chr15	1	1	1	1	1	3	1	1	1	1	1	1	1	1	1	1	1	1	1	1	1	1	1	1	1	1	1	1	1	1	1	1	1	1	1	1	1	1	1	1	1	1	1	1	1	1	1
168	NTU189	Chr15	1	4	4	1	4	1	1	1	4	1	1	1	1	1	1	1	1	1	1	1	1	4	1	1	1	1	1	1	1	1	1	1	1	1	4	1	1	1	1	1	4	1	4	1	4	4	4
169	BNL1350	Chr15	1	1	1	1	1	1	1	1	1	1	1	1	1	1	1	1	1	1	1	1	1	1	1	1	1	1	1	1	1	1	1	1	1	1	1	1	1	1	1	1	1	1	1	1	1	1	2
170	BNL2646	Chr15	1	1	1	1	1	3	1	1	1	3	1	1	1	1	1	1	1	1	1	2	1	1	2	1	1	2	3	1	1	3	2	3	1	1	1	1	2	1	1	1	1	3	1	3	1	1	1
171	CICR272	Chr15	1	1	1	1	1	1	1	1	1	1	1	1	1	1	1	1	1	1	1	1	1	1	1	1	1	1	1	1	1	1	1	1	1	1	1	1	1	1	1	1	1	1	3	1	1	1	1
172	MUSS523	Chr15	1	0	0	0	1	1	1	1	1	1	1	0	4	1	0	1	1	1	0	1	1	1	1	1	1	1	1	1	1	1	1	1	1	1	0	4	4	1	1	1	1	4	1	1	1	1	1
173	CICR665	Chr15	1	1	1	1	1	1	1	1	1	1	1	1	1	1	1	1	1	1	1	1	1	1	1	1	1	1	1	1	1	1	1	1	1	1	1	1	2	1	1	1	1	1	1	1	1	1	1
174	CICR420	Chr15	1	1	1	1	1	1	1	1	1	1	1	1	1	0	1	3	1	1	1	1	1	1	1	1	1	1	1	1	1	1	1	0	2	1	1	1	1	1	1	1	1	1	1	1	1	0	1
175	NAU5138	Chr15	1	1	1	1	1	1	1	1	1	0	1	1	1	1	1	1	1	1	1	1	1	1	2	1	1	1	1	3	1	0	1	1	2	1	1	2	2	0	1	3	1	1	1	1	1	1	2
176	DPL0501	Chr16	1	1	1	1	1	1	1	1	2	1	1	1	1	1	1	2	1	1	1	1	1	1	1	1	1	1	1	1	2	1	1	1	2	1	1	1	1	1	1	1	1	1	1	1	1	2	2
177	CICR791	Chr16	1	1	1	0	1	1	1	1	1	1	1	1	1	1	1	1	1	1	1	1	1	1	1	1	1	1	1	1	1	1	1	1	1	1	1	1	1	1	1	1	1	1	1	1	1	1	1
178	CICR227	Chr16	1	1	1	1	1	1	1	1	1	1	1	3	1	1	1	1	1	1	1	1	1	1	1	1	1	1	1	1	1	1	1	1	1	1	1	1	1	0	1	1	1	1	1	1	1	1	1
179	NAU2862	Chr16	2	2	1	2	2	1	2	1	1	3	2	1	1	2	3	1	2	3	0	1	1	1	2	2	1	1	1	2	1	1	2	2	1	2	3	1	1	2	2	0	2	3	2	2	2	1	2
180	CICR677	Chr16	1	1	1	1	1	1	0	1	1	1	1	1	1	1	0	1	1	1	1	1	0	1	1	1	1	1	1	1	1	0	1	1	1	1	1	1	1	1	1	1	1	1	1	1	1	1	2
181	CICR226	Chr16	1	1	1	1	1	1	1	1	1	1	1	1	1	1	1	1	1	1	1	1	1	1	1	1	1	1	1	1	1	1	1	1	1	1	1	1	4	4	1	1	1	1	1	1	1	1	1
182	CICR107	Chr16	1	1	1	1	1	1	1	1	1	1	1	1	1	1	1	1	1	1	1	1	1	1	1	1	1	1	1	2	1	1	1	1	1	1	1	1	1	1	1	1	1	1	1	1	1	1	2
183	BNL2734	Chr16	1	1	1	1	1	3	1	1	1	1	1	1	1	1	1	1	1	1	1	1	1	1	1	1	1	1	1	1	1	1	1	1	1	1	1	1	1	1	1	1	1	1	1	1	1	1	1
184	DPL0223	Chr16	1	1	1	1	1	1	0	1	1	0	0	1	1	1	1	1	1	0	0	0	1	0	1	1	1	0	1	1	1	1	0	0	0	1	1	0	1	0	1	1	1	0	1	1	0	1	1
185	DPL0385	Chr16	1	1	1	1	1	1	1	1	1	1	1	1	1	1	1	1	1	1	1	1	1	1	1	1	1	1	1	1	1	1	1	1	1	1	1	4	4	1	1	1	1	1	1	1	1	1	1
186	CICR859	Chr16	1	1	1	0	0	1	1	1	1	1	1	1	1	1	1	1	1	1	0	1	1	1	1	1	1	1	1	1	1	1	1	1	1	1	1	2	2	1	1	1	1	1	1	1	1	1	1
187	CICR166b	Chr16	1	2	2	1	1	1	1	3	3	1	1	1	1	1	1	3	1	1	1	1	2	1	1	1	2	3	3	1	1	1	1	1	1	1	1	1	2	1	1	1	1	1	1	0	1	1	1
188	BNL1604	Chr16	1	1	1	1	1	1	1	2	2	1	1	1	1	1	1	1	2	1	1	1	1	1	1	1	1	1	1	1	1	1	1	1	1	1	1	1	1	1	1	1	1	1	1	1	1	1	1
189	NTU175	Chr16	1	1	1	1	1	4	1	1	1	1	1	1	1	1	1	1	1	1	1	1	1	1	1	1	1	1	1	1	1	1	1	1	1	1	1	1	1	1	1	1	1	1	1	1	1	1	1
190	CICR447	Chr17	4	4	1	4	4	1	4	1	1	1	4	1	4	1	1	1	1	1	4	1	1	1	1	4	1	1	1	4	1	1	1	1	1	4	4	1	1	4	0	4	1	4	4	1	1	1	1
191	NAU1028	Chr17	2	2	1	1	1	3	3	1	1	2	1	2	1	1	1	1	1	1	0	1	1	1	1	2	1	1	1	2	1	1	1	1	1	1	1	1	1	2	1	1	1	1	1	1	1	2	2
192	NAU3639	Chr17	1	1	1	1	1	1	1	1	1	1	1	1	1	1	3	1	1	1	1	2	2	1	1	1	2	2	2	2	1	1	2	1	1	3	3	2	1	1	3	2	2	2	3	1	1	1	1
193	NAU5443a	Chr17	5	5	2	2	5	5	5	5	5	5	2	5	5	2	5	5	5	5	5	5	5	5	0	2	5	5	5	5	5	5	2	5	2	2	5	5	0	0	2	5	2	2	2	5	5	5	5
194	BNL2496A	Chr17	5	5	5	5	5	5	5	5	5	5	5	5	5	5	5	5	5	5	5	5	5	5	5	5	5	2	5	5	5	5	5	5	5	5	5	5	5	5	2	5	5	5	5	5	5	5	5
195	NAU2836	Chr17	1	1	1	1	1	1	1	1	1	1	1	1	2	1	1	1	1	3	1	1	1	1	1	1	1	1	1	1	1	1	1	1	1	1	1	1	2	1	1	1	1	1	1	1	1	1	2
196	BNL243	Chr18	1	1	1	1	1	1	1	1	1	1	1	2	1	1	1	1	1	1	1	1	1	1	1	2	1	1	1	1	1	1	1	1	1	1	1	1	1	1	1	1	1	1	1	1	1	1	1
197	BNL193	Chr18	1	1	2	1	1	2	1	2	2	2	3	1	2	1	2	2	2	3	2	2	2	1	2	1	2	2	2	2	1	2	2	2	1	1	2	1	1	1	1	1	0	1	1	3	2	1	2
198	BNL4067	Chr18	5	5	5	5	5	5	5	5	5	5	5	5	5	5	5	5	5	5	5	5	5	5	5	5	5	5	5	5	5	5	5	5	5	5	5	5	5	5	5	5	5	5	5	5	5	5	5
199	DPL0249a	Chr18	1	2	1	2	2	2	2	3	3	3	1	1	1	1	2	1	3	2	1	1	1	1	1	1	2	1	1	1	1	1	1	2	1	1	1	1	1	1	1	3	1	2	1	1	2	3	2
200	CICR316	Chr18	4	1	1	1	1	1	1	1	1	4	1	4	4	1	1	4	1	4	1	1	1	4	4	4	4	1	4	4	4	0	1	1	4	1	1	4	4	0	1	4	1	1	1	4	1	4	4
201	BNL2652	Chr18	1	1	1	1	1	1	1	3	3	1	1	1	1	1	1	3	1	1	1	1	1	1	1	1	1	1	1	1	1	1	1	1	3	1	1	1	1	1	1	1	1	1	1	1	1	3	1
202	CICR882	Chr18	1	1	1	1	1	1	1	1	1	1	1	1	1	1	1	2	1	1	1	1	1	1	1	1	1	1	1	1	1	1	1	1	1	1	1	1	1	1	1	1	1	1	1	1	1	2	1
203	BNL1721	Chr18	1	1	1	1	1	1	1	1	1	1	1	1	2	1	1	1	1	1	1	2	1	1	1	1	1	1	1	1	1	1	1	1	1	1	1	1	1	1	1	1	1	1	1	1	1	1	1
204	MUSS603	Chr18	1	1	1	1	1	1	1	2	2	1	1	1	1	1	1	2	1	1	1	1	1	1	1	1	1	1	1	1	1	1	1	1	1	1	1	1	1	1	1	1	1	1	1	1	1	1	1
205	CICR612	Chr18	1	1	1	0	1	0	1	1	1	1	1	1	1	1	0	1	1	1	1	1	1	1	1	2	1	1	1	1	1	1	1	1	1	1	1	1	1	1	1	1	1	1	1	0	1	1	1
206	CICR428	Chr18	1	1	1	1	1	1	1	1	1	1	1	1	1	1	1	1	1	1	1	1	1	1	1	1	1	1	1	1	1	1	1	1	1	1	1	1	1	1	1	1	1	1	1	1	0	1	1
207	CICR273	Chr18	1	1	1	1	1	1	1	1	1	1	1	1	1	1	1	1	1	1	1	1	1	1	1	2	1	1	1	1	1	1	1	1	1	1	1	1	1	1	1	1	1	1	1	1	1	1	1
208	CICR153	Chr18	5	5	5	5	5	5	5	5	5	5	5	5	5	5	5	5	5	5	5	5	5	5	5	2	5	5	5	5	5	5	5	5	5	5	5	5	5	2	5	5	5	5	5	5	5	5	5
209	NTU216	Chr18	5	5	5	2	5	5	2	2	5	5	5	2	5	2	2	5	5	2	5	5	5	5	2	2	5	2	5	5	5	5	2	2	5	5	5	5	2	2	2	2	5	5	5	5	5	5	5
210	CICR675	Chr18	1	1	1	0	1	1	1	2	2	1	0	2	1	1	1	2	1	1	1	1	1	0	1	1	1	1	1	1	1	1	1	1	1	1	1	2	2	1	1	1	1	1	1	1	1	0	1
211	CICR189	Chr19	1	1	1	1	1	1	1	1	1	1	1	1	1	1	1	1	1	1	1	1	1	1	3	1	1	2	1	1	3	1	1	1	1	1	1	1	1	1	1	1	1	1	1	1	1	1	1
212	CIR224	Chr19	1	1	1	1	1	4	1	1	1	4	1	1	1	1	1	4	1	1	1	1	1	1	1	1	1	1	1	1	4	1	1	1	1	1	1	1	1	1	1	1	1	1	1	4	1	1	1
213	DPL0247	Chr19	1	1	1	1	1	1	1	1	1	2	1	1	1	1	1	1	1	3	1	1	1	1	1	1	1	1	1	1	3	1	1	1	1	1	1	1	1	1	1	1	1	1	1	1	1	1	1
214	CICR632	Chr19	1	1	1	1	1	1	1	1	1	3	1	1	1	1	1	1	1	1	1	1	1	0	2	1	1	2	1	1	2	1	1	1	1	1	1	1	1	1	0	1	1	1	1	1	1	1	1
215	NAU3405b	Chr19	1	1	1	4	1	1	1	1	1	1	1	1	1	1	1	1	4	1	1	1	1	1	1	1	1	1	1	1	1	1	4	1	1	4	1	1	1	1	4	1	1	1	1	1	1	1	1
216	NAU3405c	Chr19	1	1	1	1	1	1	1	4	1	1	1	1	1	1	1	1	1	1	1	1	1	1	1	1	1	4	1	1	1	1	1	1	1	1	1	1	1	1	1	1	1	1	1	1	1	1	1
217	NAU3405a	Chr19	1	1	1	1	1	1	1	1	1	4	1	1	1	1	1	1	1	1	1	1	1	1	1	1	1	1	1	4	1	1	1	1	1	1	1	1	1	1	1	1	1	1	1	1	1	1	1
218	NTU231	Chr19	1	1	1	0	1	1	1	4	1	1	1	1	1	1	1	1	1	1	1	1	1	1	1	1	1	4	1	1	1	1	1	1	1	1	1	1	1	1	1	1	1	1	1	1	1	1	1
219	CICR440	Chr19	1	1	2	1	1	1	1	1	1	1	1	0	2	2	2	1	2	0	1	1	1	2	0	1	1	2	1	1	1	1	1	2	1	1	2	1	1	2	1	1	1	1	1	2	1	1	1
220	CICR544	Chr19	1	1	1	1	1	1	1	1	1	1	1	1	1	1	1	1	1	1	1	1	1	1	1	1	1	1	1	1	1	0	1	1	1	1	1	1	1	1	0	1	1	1	1	1	1	1	1
221	NAU3828	Chr19	1	1	1	1	1	1	1	4	1	1	1	1	4	1	1	1	4	1	1	1	1	1	1	1	1	1	1	1	1	1	1	4	1	1	4	4	1	1	1	1	1	1	1	4	4	1	4
222	DPL0140	Chr19	1	1	1	1	1	1	1	1	1	1	1	1	1	1	1	1	1	1	1	1	1	1	1	1	1	1	1	1	2	1	1	1	1	1	1	1	1	1	1	1	1	1	1	1	1	1	1
223	NAU4030	Chr19	1	1	1	1	1	1	1	1	1	1	1	1	3	1	1	1	1	0	1	1	1	1	1	2	1	1	1	1	1	1	1	1	1	1	1	1	1	1	1	1	1	1	1	1	1	1	1
224	BNL3452	Chr19	1	2	2	1	3	1	1	1	1	2	2	1	1	1	1	1	1	1	2	1	1	1	1	1	2	1	1	1	1	2	1	1	1	1	1	1	1	2	2	1	1	1	2	2	2	1	1
225	CIR165	Chr19	1	2	1	2	2	3	1	1	1	1	2	1	3	1	1	1	1	3	2	1	3	1	1	1	2	1	3	1	3	2	1	3	1	1	1	1	1	2	2	1	3	1	2	2	2	1	1
226	NTU22	Chr19	1	1	1	1	1	1	1	1	1	1	1	1	1	1	1	1	1	1	1	1	1	1	3	1	1	1	3	1	1	1	1	1	1	1	1	1	3	1	1	1	1	1	1	1	1	1	1
227	NAU4884	Chr19	1	1	1	1	1	1	1	1	1	2	1	1	1	1	1	1	1	1	1	1	1	1	1	1	1	2	1	1	3	1	1	1	1	1	1	1	1	1	1	1	1	1	1	1	1	1	1
228	BNL2715	Chr19	1	1	1	1	1	1	1	1	1	1	1	1	1	1	1	1	1	1	1	1	1	1	1	1	1	2	1	1	1	1	1	1	1	1	1	1	1	1	1	1	1	1	1	1	1	1	1
229	CIR212	Chr19	1	1	1	1	1	1	1	1	1	1	1	1	1	1	1	1	1	1	1	1	1	1	1	1	1	2	1	1	1	1	1	1	1	1	1	1	1	1	1	1	1	1	1	1	1	1	1
230	BNL4071	Chr19	1	1	1	1	1	4	1	1	1	1	1	1	1	1	1	1	1	1	1	1	1	1	1	1	1	1	1	1	1	1	1	1	1	1	1	1	1	1	1	1	1	1	1	1	1	1	1
231	BNL285	Chr19	1	1	1	1	1	1	1	1	1	1	1	1	1	1	1	1	1	1	1	1	1	1	1	1	1	1	1	1	1	1	1	1	1	1	1	1	1	1	1	1	1	1	1	1	1	1	2
232	BNL3029	Chr19	1	1	1	1	1	1	1	1	1	1	1	1	1	1	1	1	1	1	1	2	3	1	2	1	2	1	3	1	1	1	1	1	1	1	1	1	1	2	1	1	1	1	1	1	1	1	1
233	DPL0444	Chr19	1	1	1	1	1	1	1	2	2	1	1	1	1	1	1	2	1	1	1	1	1	1	1	1	1	1	1	1	1	1	1	1	1	1	1	1	1	1	1	1	1	1	1	1	1	1	1
234	CICR443	Chr19	2	2	1	2	2	2	2	1	1	2	2	2	1	2	1	1	1	3	2	1	3	1	1	2	1	2	3	3	2	2	3	2	2	2	1	2	2	1	2	2	2	2	2	2	2	2	2
235	CICR831	Chr19	2	2	1	2	2	2	2	1	1	2	2	2	1	2	1	1	1	0	0	3	1	1	2	1	2	3	3	2	2	3	2	2	2	2	1	2	2	1	0	2	2	2	2	2	2	2	2
236	CICR524	Chr19	2	2	3	2	2	2	2	1	3	2	2	0	1	0	1	1	1	3	2	3	3	0	0	2	1	2	3	3	2	2	2	0	2	2	3	2	1	1	2	2	2	2	2	2	2	2	2
237	CICR056	Chr19	2	2	1	2	2	2	2	1	1	2	2	2	1	2	1	1	1	3	2	1	3	1	1	2	1	2	3	3	2	2	3	2	2	2	1	2	2	1	2	2	3	2	2	2	2	2	2
238	CICR826	Chr19	2	2	5	2	2	2	2	5	5	2	2	2	5	2	5	5	5	5	2	5	5	5	5	2	5	2	5	5	2	2	5	2	2	2	5	2	2	5	2	2	2	2	2	2	2	2	2
239	CICR827	Chr19	2	2	1	2	2	2	2	1	1	2	2	2	1	2	1	1	3	3	2	1	3	1	1	2	1	2	3	3	2	2	3	2	2	2	1	2	2	1	2	2	2	2	2	2	2	2	2
240	CICR300	Chr19	2	2	1	2	2	2	2	1	1	2	2	2	1	2	1	1	1	3	2	1	3	1	1	2	1	2	3	3	2	2	3	2	2	2	1	2	2	1	2	2	3	2	2	2	2	2	2
241	CICR144	Chr19	2	2	1	2	2	2	2	1	1	2	2	2	1	2	1	1	1	3	2	1	3	1	1	2	1	2	3	3	2	2	3	2	2	2	1	2	2	1	2	2	3	2	2	2	2	2	2
242	CICR554	Chr19	2	2	1	2	2	2	2	1	1	2	2	2	1	2	1	1	1	3	2	1	3	1	1	2	1	2	3	3	2	2	3	2	2	2	1	2	2	1	0	2	2	2	2	0	2	2	0
243	CICR540	Chr19	2	2	2	2	2	2	2	2	2	2	2	2	2	2	5	5	5	5	2	5	5	5	0	2	2	2	5	5	2	2	5	2	2	2	2	2	2	5	2	2	5	2	2	2	2	2	2
244	CICR431	Chr19	2	2	1	2	2	2	2	1	1	2	2	2	1	2	1	1	1	2	2	1	2	1	2	2	1	2	3	2	2	2	2	2	2	2	1	2	2	0	2	2	2	2	2	2	2	2	2
245	CICR609	Chr19	2	2	1	0	2	2	2	1	1	2	2	2	1	2	1	1	1	3	2	1	3	1	1	2	1	2	3	3	2	2	3	1	2	2	1	2	2	1	2	2	2	2	2	2	2	2	2
246	CICR803	Chr19	2	2	1	2	2	2	2	1	1	2	2	2	1	2	1	1	1	1	0	1	1	1	1	2	1	2	3	3	2	2	3	2	2	2	1	2	2	1	2	2	2	2	2	2	2	2	2
247	CICR808	Chr19	2	2	5	2	2	2	2	5	5	5	2	2	5	2	5	5	5	5	2	5	5	5	5	2	5	2	5	5	2	2	0	2	2	2	5	2	2	5	2	2	0	2	2	2	2	2	5
248	CICR536	Chr19	2	2	1	0	2	2	2	1	1	2	2	2	1	2	1	1	1	2	2	1	0	1	1	2	1	2	3	3	2	2	3	2	2	2	1	2	2	1	2	2	2	2	2	2	2	2	2
249	CICR580	Chr19	2	2	5	2	2	2	2	5	5	2	2	2	5	2	5	5	5	5	2	5	5	0	0	2	5	2	5	5	2	2	5	2	2	2	5	2	2	5	2	2	2	2	2	2	2	2	2
250	CICR818	Chr19	2	2	1	2	2	2	2	1	1	2	2	2	1	2	1	1	1	1	2	3	3	1	1	2	1	2	3	3	2	2	3	2	0	2	3	2	2	1	2	2	2	2	2	2	2	2	2
251	CICR271	Chr19	2	2	1	2	2	2	2	1	1	1	2	2	1	2	3	1	1	1	3	1	3	2	1	2	1	2	3	3	2	2	3	2	2	2	1	2	2	1	2	2	1	2	2	2	1	2	2
252	CICR835	Chr19	2	2	1	2	2	2	2	1	1	2	2	2	0	2	1	1	1	3	0	1	3	1	1	2	1	2	3	3	0	2	3	2	2	2	1	2	2	1	2	2	2	2	2	2	2	2	2
253	CICR500	Chr19	2	2	3	2	2	0	2	1	1	2	2	2	1	0	1	1	1	3	2	1	3	1	1	2	1	2	3	3	2	2	3	2	2	2	1	2	2	0	2	2	2	2	2	2	2	2	2
254	CICR352	Chr19	2	2	3	3	2	2	2	1	1	2	2	2	3	2	1	1	1	3	2	1	3	3	1	2	1	2	3	3	2	2	3	2	2	2	1	2	1	2	0	2	3	2	2	2	2	2	2
255	CICR421	Chr19	2	2	3	3	2	2	2	1	1	2	2	2	1	2	0	1	1	3	2	1	3	1	3	2	1	2	3	3	2	2	3	2	2	2	1	2	2	3	2	2	2	2	2	2	2	2	0
256	CICR150	Chr19	2	2	1	2	2	2	2	1	1	2	2	2	1	2	1	1	1	3	2	1	3	1	1	2	1	2	3	3	2	2	3	2	2	2	1	2	2	1	2	2	3	2	2	2	2	2	2
257	CICR262	Chr19	2	2	2	2	2	2	2	1	1	2	2	2	1	2	1	1	1	3	2	1	3	1	1	2	1	2	3	3	0	2	3	2	2	2	0	2	2	1	2	2	3	2	2	2	2	2	2
258	CICR252	Chr19	2	2	5	2	2	2	2	5	5	2	2	2	5	2	5	5	5	2	2	5	2	5	5	2	5	2	2	2	2	2	2	2	2	2	5	2	5	5	2	2	2	2	2	2	2	2	2
259	CICR212	Chr19	2	2	1	2	2	2	2	1	1	2	2	2	1	2	1	1	1	3	2	1	3	1	1	2	1	2	3	3	2	2	3	2	2	2	1	2	2	1	2	2	3	2	2	2	2	2	2
260	CICR203	Chr19	2	2	1	2	2	2	2	1	1	2	2	2	1	2	1	1	1	3	2	1	3	1	1	2	1	2	3	3	2	2	3	2	2	2	1	2	2	1	2	2	3	2	2	2	2	2	2
261	CICR163	Chr19	2	2	1	2	2	2	2	1	1	2	2	2	1	2	1	1	1	3	2	1	3	1	1	2	1	2	3	0	0	2	0	2	2	0	1	2	2	1	2	2	3	2	2	2	2	2	2
262	CICR284	Chr19	2	2	1	2	2	2	2	1	1	2	2	2	1	2	1	1	1	3	2	1	3	1	1	2	1	2	3	3	2	2	3	2	2	2	1	2	2	1	2	2	3	2	2	2	1	2	2
263	CICR401	Chr19	2	2	3	3	2	2	2	1	1	2	2	2	1	2	1	1	1	3	2	1	3	1	0	2	1	2	3	3	2	2	3	2	2	2	1	2	2	1	0	2	3	2	2	2	2	2	0
264	CICR520	Chr19	3	3	3	0	3	1	0	2	2	1	3	1	3	3	3	2	3	3	3	3	3	3	3	1	3	1	3	3	1	1	3	1	1	3	3	1	1	3	3	1	1	1	3	1	3	1	1
265	BNL3903	Chr19	1	1	1	1	1	1	1	2	2	1	1	1	1	1	1	2	1	1	1	1	1	1	1	1	1	1	1	1	1	1	1	1	1	1	1	1	1	1	1	1	1	1	1	1	1	1	1
266	BNL3811	Chr19	1	1	1	1	1	1	1	1	1	1	1	1	1	1	3	1	1	1	1	3	3	1	1	1	3	1	3	3	1	3	1	1	1	1	1	1	1	1	3	1	1	1	1	1	1	1	1
267	MUSS118	Chr19	1	1	1	1	1	1	1	1	2	1	2	1	1	1	1	1	1	1	1	1	1	1	1	1	1	1	1	1	1	1	1	1	1	1	1	1	1	2	1	1	1	1	1	1	1	1	1
268	CICR782	Chr19	1	1	1	0	1	1	1	1	1	1	1	0	1	1	1	1	1	0	1	1	0	1	0	0	1	1	1	1	1	1	1	1	1	1	1	2	2	1	1	1	1	1	1	1	1	1	2
269	NTU152	Chr19	1	1	1	1	1	1	1	1	1	1	1	3	1	1	1	1	1	1	0	1	1	1	1	2	1	1	1	1	1	1	1	1	1	1	1	1	1	1	1	1	1	1	0	1	1	1	1
270	BNL3992	Chr19	1	1	1	1	1	1	1	1	1	1	1	1	1	1	1	1	1	1	1	1	1	1	1	1	1	1	1	1	1	1	1	1	1	1	1	2	2	1	1	1	1	1	1	1	1	1	2
271	BNL3977	Chr19	1	1	1	1	1	1	1	1	1	1	1	1	1	1	1	1	1	1	1	1	1	1	2	1	1	1	1	1	1	1	1	1	3	1	1	1	1	1	1	1	1	1	1	1	1	1	1
272	CICR780	Chr19	5	5	5	5	5	5	5	5	5	5	5	5	5	5	5	5	5	5	5	5	5	5	0	5	5	5	5	5	5	5	0	5	5	5	5	2	2	0	5	5	5	5	5	5	5	5	5
273	NAU5489	Chr19	1	1	1	1	1	1	0	1	1	1	1	1	1	1	1	1	1	1	1	1	1	1	1	1	1	1	1	1	0	1	1	1	1	1	1	2	1	1	1	1	1	1	1	1	1	1	1
274	NAU3498	Chr19	1	1	1	1	1	1	1	1	1	1	1	1	2	1	1	1	1	1	0	1	1	1	1	1	1	1	1	1	1	1	1	1	2	1	1	1	1	1	1	1	1	1	1	1	1	2	1
275	NAU4045b	Chr19	4	1	4	1	4	1	4	4	1	4	4	4	4	1	1	1	1	0	1	1	4	1	1	4	4	1	4	1	4	4	1	1	4	1	1	1	1	1	1	1	1	1	1	1	1	4	1
276	NAU3205	Chr19	1	1	1	1	1	1	1	1	1	1	1	2	1	1	1	1	1	1	1	1	1	1	1	1	1	1	1	1	1	1	1	1	1	1	1	1	1	1	1	1	1	1	1	1	1	1	1
277	BNL3535a	Chr19	1	1	1	1	1	1	1	1	1	0	1	2	1	1	1	1	1	1	1	1	1	3	1	1	1	1	1	1	1	1	1	3	1	1	1	1	1	1	1	1	1	1	1	1	1	1	1
278	BNL632	Chr19	1	1	1	1	1	1	1	1	1	1	1	1	1	1	1	2	1	1	1	1	1	1	1	1	1	1	1	2	1	1	1	1	1	1	1	1	1	1	1	2	1	1	1	1	1	1	1
279	CICR002b	Chr20	5	5	5	5	5	5	5	5	5	5	5	5	2	5	2	5	2	5	5	5	5	5	0	5	5	5	5	5	5	5	5	5	5	5	5	5	5	5	2	5	5	2	5	5	5	5	5
280	CIR094	Chr20	1	1	1	1	1	1	1	1	1	1	1	1	1	1	1	1	1	1	1	1	1	1	1	1	1	1	1	1	1	1	1	1	1	1	1	1	1	1	1	1	1	1	1	1	1	1	1
281	CICR297	Chr20	2	2	1	2	2	2	2	1	1	2	2	2	1	2	1	1	1	3	2	1	3	1	1	2	1	2	3	3	2	2	3	2	2	2	1	2	2	1	2	2	3	2	2	2	2	2	2
282	CICR385	Chr20	3	2	3	3	3	3	2	2	3	3	2	2	1	2	3	1	1	3	2	3	3	1	3	2	1	2	3	3	2	2	3	2	2	2	3	2	2	3	2	2	3	2	2	2	2	2	2
283	CICR856	Chr20	2	2	1	2	2	2	2	1	1	2	2	2	1	0	1	1	1	3	0	3	3	1	1	2	1	2	3	3	2	2	3	2	2	2	1	2	2	1	0	2	3	2	2	2	2	2	2
284	CICR848	Chr20	2	2	1	2	2	2	2	1	1	2	2	2	1	2	1	1	1	3	0	1	3	1	1	2	1	2	3	3	2	2	3	2	2	2	1	2	0	0	1	2	2	2	2	2	2	2	2
285	NTU172	Chr20	1	3	1	1	1	1	1	1	1	1	1	1	1	1	1	3	1	0	0	1	1	1	1	1	1	1	1	0	1	1	1	1	2	1	1	1	0	1	1	0	1	1	1	1	1	1	1
286	NAU3917	Chr20	5	5	5	5	5	5	5	5	5	5	5	5	5	5	5	5	5	5	5	2	5	5	5	5	5	5	5	5	5	2	5	5	5	5	5	5	5	5	5	5	5	5	5	5	5	5	5
287	BNL1161	Chr20	1	1	1	1	1	1	1	1	1	1	1	1	1	1	1	1	1	4	1	1	1	1	1	1	1	1	1	1	1	1	1	1	1	1	1	1	1	1	1	1	1	1	1	1	1	1	1
288	CICR317	Chr20	1	1	1	1	1	1	1	1	1	1	1	1	1	1	1	1	1	1	1	1	1	2	3	1	1	1	1	1	1	1	1	1	1	1	1	1	1	1	1	1	1	1	1	1	1	1	1
289	NAU3574	Chr20	2	1	1	1	1	1	1	1	1	1	1	1	1	1	1	1	1	1	1	1	1	1	1	1	1	1	1	1	1	1	1	1	1	1	1	1	1	1	1	1	1	1	1	1	1	1	1
290	NAU4928	Chr20	1	1	1	1	1	1	1	1	1	3	1	1	1	1	1	1	1	1	1	1	1	1	1	1	1	1	1	1	1	1	1	1	1	1	1	1	1	1	1	1	1	1	1	1	1	1	1
291	DPL0442	Chr20	1	1	1	1	1	1	2	1	1	1	2	1	2	2	2	2	2	2	2	1	1	1	0	2	2	2	2	1	2	1	1	1	3	1	2	1	2	1	3	1	3	3	3	2	2	2	1
292	NTU178	Chr20	2	1	1	0	1	1	1	1	1	1	1	1	1	0	1	2	1	1	2	1	1	3	0	1	1	1	1	1	1	1	1	1	1	1	1	1	1	0	1	1	1	1	1	1	1	1	1
293	BNL3646	Chr20	5	5	5	5	5	5	5	5	5	5	5	5	5	5	5	5	5	2	5	5	5	5	5	5	5	5	5	5	5	5	5	5	5	5	5	5	5	5	5	5	5	5	5	5	5	5	5
294	NAU3377	Chr21	3	1	1	3	1	0	3	1	1	3	1	1	1	1	3	1	1	1	0	1	1	1	1	1	1	1	1	1	1	1	1	1	1	1	1	1	1	1	1	1	1	1	1	1	1	1	1
295	BNL3623	Chr21	1	1	1	1	1	1	1	4	4	0	1	1	1	1	1	4	1	1	1	1	1	1	1	1	1	1	1	1	1	1	1	1	4	1	1	1	1	1	1	1	1	1	1	1	1	4	1
296	NTU165	Chr21	1	1	1	1	4	1	0	1	1	0	1	1	1	1	1	1	1	1	0	1	0	1	1	1	1	1	1	1	1	1	1	1	1	1	1	0	1	1	1	1	1	1	1	1	1	1	1
297	NAU3341	Chr21	1	1	1	1	1	1	1	1	1	1	1	1	1	1	1	1	1	1	1	1	1	1	1	1	1	1	1	1	1	1	1	1	1	1	1	1	1	1	1	1	1	1	1	2	1	1	2
298	NAU3074	Chr21	1	1	1	1	1	2	1	1	1	1	1	0	1	1	1	1	2	1	1	1	1	1	1	2	1	1	1	2	2	1	1	1	2	1	2	2	2	1	1	2	1	2	1	2	1	2	2
299	BNL1034	Chr21	1	1	1	1	1	1	1	1	1	1	1	1	1	1	1	1	1	1	1	1	1	1	1	1	1	1	1	1	1	1	1	1	1	1	1	1	1	1	1	1	1	1	1	2	1	1	1
300	CICR559	Chr21	1	1	1	1	1	1	1	1	1	1	1	1	1	1	1	1	1	1	1	1	1	1	1	2	1	1	1	1	1	0	0	1	1	1	1	1	1	1	1	1	1	1	1	1	1	0	1
301	CICR349	Chr21	1	1	0	1	1	1	1	1	1	1	1	1	1	1	2	2	1	1	1	1	1	1	1	1	1	1	1	1	1	2	1	1	1	1	1	1	2	1	1	1	1	1	1	1	1	1	1
302	CICR340b	Chr21	1	1	1	1	1	3	1	3	3	1	1	1	1	1	1	3	1	1	1	1	2	1	1	1	3	3	2	1	1	3	1	1	1	1	1	1	2	1	1	1	1	1	1	1	1	1	1
303	CICR302	Chr21	1	1	1	1	1	3	1	3	3	1	1	1	1	1	1	3	1	1	1	1	3	1	1	1	3	3	3	1	1	3	1	1	1	1	1	1	1	1	1	1	1	1	3	1	1	1	1
304	CICR337	Chr21	1	1	1	1	2	2	1	0	2	2	1	3	2	2	2	0	1	1	1	3	0	1	2	1	0	0	0	1	1	2	1	1	2	1	1	2	2	3	1	1	1	3	1	2	1	2	2
305	CICR533	Chr21	1	1	1	1	1	3	1	3	3	1	1	1	1	1	1	3	1	1	1	1	3	1	1	1	3	3	1	1	1	1	1	2	2	2	2	1	1	1	1	1	1	1	1	1	1	1	1
306	CICR531	Chr21	1	1	1	1	1	1	1	3	3	1	1	1	1	1	0	3	1	1	1	1	1	1	1	1	3	3	3	1	1	1	1	1	1	1	1	1	1	1	1	1	1	1	1	1	1	1	1
307	CICR166a	Chr21	1	1	1	1	2	2	1	0	0	2	1	3	2	1	1	0	1	1	1	3	0	1	2	1	0	0	0	1	1	2	1	1	3	1	1	2	2	1	1	1	1	3	1	0	1	3	2
308	CICR286	Chr21	2	2	2	2	1	1	2	0	0	1	2	3	1	2	2	0	2	2	2	3	0	2	1	2	0	0	0	2	2	1	2	2	3	2	2	1	1	1	2	2	2	3	2	1	2	3	1
309	BNL3997	Chr21	1	1	1	1	1	3	1	3	3	3	1	1	1	1	1	2	2	1	1	1	1	1	3	1	1	3	3	1	1	1	1	3	1	1	1	1	1	1	1	1	1	1	1	1	1	2	1
310	BNL1551	Chr21	5	5	5	5	5	5	5	5	5	5	5	5	2	5	5	5	5	5	5	5	5	5	5	5	5	2	5	5	5	5	5	5	5	5	5	5	5	5	5	5	5	5	5	5	5	5	5
311	NAU5505	Chr21	1	1	1	0	4	1	1	1	4	1	1	1	1	1	1	4	1	1	0	1	1	1	1	1	1	1	1	1	4	1	0	1	1	1	1	1	1	0	1	1	1	1	1	1	1	1	1
312	NTU208	Chr21	5	5	5	5	5	5	5	2	2	5	5	2	5	5	5	2	5	5	5	5	5	5	5	5	5	2	5	5	5	5	5	5	5	5	5	5	5	5	5	5	5	5	5	5	5	5	5
313	NAU2954	Chr21	1	1	1	1	1	1	1	2	2	2	1	2	2	1	1	2	1	3	1	1	1	1	1	2	1	2	1	1	1	1	1	1	2	1	1	1	1	1	1	1	1	2	1	2	1	1	2
314	DPL0417	Chr22	4	1	1	0	4	1	4	1	1	4	1	4	1	1	1	1	1	1	1	1	1	1	4	4	1	1	1	4	1	1	1	1	1	1	1	1	1	1	1	1	1	4	1	1	1	1	1
315	CICR482	Chr22	1	1	1	1	1	1	1	1	1	1	1	1	1	1	1	1	1	1	1	1	1	1	1	1	1	1	1	1	1	1	1	1	1	1	1	1	1	1	1	1	1	3	1	1	1	1	1
316	BNL3601	Chr22	1	4	1	4	1	1	4	1	1	1	1	4	1	1	1	1	4	1	1	1	1	1	1	1	1	1	1	1	1	1	1	1	1	1	1	1	1	1	1	1	1	4	1	1	1	1	1
317	NAU5046	Chr22	3	3	1	3	1	1	1	3	3	2	1	3	3	3	1	3	1	1	2	3	1	2	1	1	1	3	1	3	1	1	1	2	3	1	1	1	1	1	1	1	1	1	1	1	1	3	1
318	NAU2376	Chr22	0	1	1	1	2	1	1	1	1	1	1	1	1	1	1	1	1	1	1	1	1	1	1	1	1	1	1	1	1	1	1	1	1	1	1	1	1	1	1	1	1	1	3	1	1	1	1
319	NAU3491	Chr22	1	1	1	1	1	1	1	1	1	1	1	1	1	1	1	1	1	1	1	1	1	1	1	1	1	1	1	1	1	1	1	1	1	1	1	1	1	1	3	1	2	1	1	1	1	1	1
320	CICR041	Chr22	5	5	5	5	5	5	5	5	5	5	5	5	5	5	5	5	5	5	5	5	5	5	5	5	5	5	5	5	2	5	5	5	5	5	5	2	2	5	0	0	0	2	2	2	0	0	5
321	CICR147	Chr22	1	1	1	1	1	1	1	1	1	1	1	1	1	1	1	1	1	1	1	1	1	1	1	1	1	1	1	1	1	1	1	1	1	1	1	1	1	1	1	1	1	1	1	2	1	1	1
322	MUSB1050	Chr22	1	1	1	1	1	3	1	1	1	1	1	1	1	1	1	2	1	1	0	1	1	1	1	1	1	1	1	1	1	1	1	1	2	1	1	1	1	1	1	1	1	1	1	2	1	3	1
323	CIR048	Chr22	1	1	1	1	1	1	1	1	1	1	1	1	1	1	1	1	1	1	1	1	1	1	1	1	1	1	1	1	1	1	1	1	1	1	1	1	1	1	1	1	1	3	1	1	1	1	1
324	CICR329	Chr22	1	1	1	1	1	0	1	1	1	1	1	1	1	1	1	0	1	1	1	1	1	1	1	1	1	1	1	1	1	1	1	1	2	1	1	1	1	1	1	1	1	1	3	1	1	1	1
325	NAU2363	Chr22	2	3	1	1	2	1	1	1	1	1	1	1	1	0	1	1	1	1	1	1	1	1	1	1	2	1	1	1	1	1	1	1	1	3	2	1	1	1	1	1	1	1	3	2	1	1	1
326	NAU3093	Chr22	1	1	1	1	1	3	1	2	2	3	1	1	1	1	1	2	1	1	1	1	1	1	1	1	1	1	1	1	2	1	1	1	1	1	1	1	1	1	1	1	1	1	1	2	1	1	1
327	CICR345	Chr22	1	1	1	0	1	1	1	1	1	1	1	1	1	1	1	1	1	1	1	1	1	1	1	1	1	1	1	1	1	1	1	1	1	1	1	1	1	1	1	1	1	1	1	1	4	1	1
328	CICR152	Chr22	1	1	1	1	1	1	1	1	1	1	1	1	1	1	1	1	1	1	1	1	1	0	1	1	1	1	2	1	1	1	1	1	1	1	1	1	1	1	1	1	1	1	1	2	1	1	1
329	CICR438	Chr22	1	1	1	1	1	1	0	1	1	2	1	1	1	2	1	1	1	1	1	1	1	1	1	1	1	1	1	1	2	1	1	1	3	1	1	1	1	1	1	1	1	1	1	1	1	3	2
330	BNL686	Chr23	1	1	1	1	1	1	1	1	1	1	1	1	1	1	1	1	1	1	1	1	1	1	1	1	1	1	1	2	1	1	1	1	1	1	1	2	1	1	1	2	1	1	1	2	1	2	1
331	DPL0222	Chr23	1	1	1	1	1	1	1	1	1	1	1	1	1	1	1	1	1	1	1	1	1	1	1	1	1	1	1	1	1	1	1	1	1	1	1	1	1	1	1	1	1	1	1	1	1	1	1
332	BNL3383	Chr23	1	2	2	1	2	1	1	1	1	1	1	2	1	1	1	1	2	1	1	1	1	1	1	1	1	1	1	1	1	1	1	1	1	1	1	1	1	1	1	1	1	1	1	1	1	1	1
333	NAU3194	Chr23	1	1	1	1	1	1	1	1	1	1	1	1	1	1	1	1	1	1	1	2	1	1	1	1	1	1	1	1	1	1	1	1	1	1	1	1	1	1	1	1	1	1	1	1	1	1	1
334	BNL3511	Chr23	1	1	1	1	1	1	2	1	1	1	1	1	1	1	1	1	1	1	1	1	1	1	1	1	1	1	1	1	1	1	1	1	1	1	1	1	1	1	1	1	1	1	1	1	1	1	1
335	BNL3031	Chr23	1	1	1	1	1	1	1	2	1	1	1	1	1	1	1	1	1	2	1	1	1	1	1	1	1	1	1	1	1	1	1	1	1	3	2	1	1	1	1	1	1	1	1	2	1	1	1
336	NTU179	Chr23	1	1	1	0	1	1	1	1	1	1	1	4	1	1	1	1	1	1	1	1	1	1	4	1	1	1	1	1	1	1	1	1	1	1	1	1	1	1	1	1	1	1	1	1	1	1	1
337	DPL0378	Chr23	1	1	1	1	1	1	1	1	1	1	1	1	1	1	1	1	1	1	1	1	1	1	1	1	1	1	1	1	2	1	1	1	1	1	1	1	1	1	1	3	1	1	1	1	1	1	1
338	CICR230	Chr23	1	1	1	1	1	1	1	1	1	1	1	1	3	1	1	1	1	1	1	1	1	2	1	1	1	1	1	1	1	1	1	1	1	1	1	1	3	1	1	1	1	1	1	1	1	1	1
339	CICR185	Chr23	1	1	1	1	1	1	1	1	1	1	1	1	1	1	1	1	1	1	1	1	1	1	1	1	1	1	1	1	1	1	1	1	1	1	1	2	2	1	1	3	1	3	1	0	1	1	1
340	BNL3790	Chr23	1	1	1	1	1	1	1	1	1	1	1	1	1	1	1	1	1	2	1	1	1	1	1	1	1	1	1	1	1	1	0	1	1	1	1	1	1	1	1	1	1	1	1	1	1	1	1
341	BNL1317b	Chr23	0	2	5	5	2	2	5	2	5	5	0	5	5	2	2	5	2	5	2	2	2	2	2	5	2	5	2	2	2	2	5	5	5	2	2	2	2	2	5	5	2	5	2	5	2	2	5
342	CICR790	Chr23	0	1	1	1	1	1	1	1	1	1	1	1	1	1	1	1	1	1	1	1	1	1	1	1	1	2	1	1	1	1	1	1	1	1	1	1	1	1	1	1	1	1	1	1	1	1	1
343	NAU5494	Chr23	0	5	5	0	0	0	0	0	5	0	5	5	0	5	5	5	5	5	5	5	5	5	5	5	5	2	5	5	5	5	5	5	5	5	5	5	5	0	5	2	5	5	5	5	5	5	5
344	DPL0262a	Chr23	1	1	1	1	1	1	1	1	1	0	3	1	1	1	1	1	1	1	1	0	1	1	1	1	2	3	3	1	1	1	1	1	1	1	1	2	2	1	1	1	1	1	1	1	1	1	1
345	CICR266	Chr23	1	1	1	1	1	1	1	1	1	1	1	1	1	1	1	1	1	1	1	3	1	2	1	1	2	1	3	2	1	3	1	1	1	1	1	1	1	1	1	1	1	1	1	1	1	1	1
346	DPL0218	Chr23	1	1	1	1	1	1	1	1	1	2	0	1	1	0	1	1	1	1	1	1	1	1	1	1	1	1	1	2	1	1	1	1	1	1	1	1	1	1	1	1	1	1	1	1	1	1	1
347	STV022	Chr23	1	1	1	0	1	2	1	2	1	1	1	1	2	0	1	1	1	1	1	2	1	1	1	1	1	1	1	1	1	2	1	1	1	1	1	1	1	2	1	2	1	1	1	3	1	1	1
348	DPL0395	Chr23	1	1	1	1	1	4	1	4	1	1	1	1	1	1	1	1	1	1	1	1	1	1	1	1	1	1	1	1	1	1	1	1	1	1	1	4	4	1	1	1	1	4	1	1	1	1	1
349	BNL3985	Chr23	1	1	1	1	1	2	1	2	2	1	1	1	1	1	1	2	1	1	1	1	1	1	1	1	1	1	1	1	1	1	1	1	1	1	1	1	1	1	1	1	1	2	1	1	1	1	1
350	BNL2835	Chr24	1	1	1	1	1	1	1	1	1	1	1	1	1	1	1	1	1	1	1	1	1	1	1	4	1	1	1	1	1	1	1	1	1	1	1	1	1	1	1	1	1	1	1	1	1	1	1
351	NAU3668	Chr24	1	1	2	2	1	1	1	1	1	1	1	1	1	1	1	1	1	1	1	1	1	1	1	1	1	1	1	1	1	1	1	1	1	1	1	1	1	1	1	1	1	1	1	1	1	1	1
352	CICR038	Chr24	1	1	1	1	1	1	1	1	1	1	1	1	1	1	1	1	1	0	1	1	1	1	1	1	1	1	1	1	1	1	1	1	1	1	1	2	2	3	1	3	1	0	1	1	1	1	1
353	NAU3632	Chr24	1	1	1	1	1	1	1	1	1	1	1	1	1	1	1	1	1	1	1	1	1	1	1	1	1	1	1	1	1	1	1	1	1	1	1	1	1	1	1	3	1	1	1	1	1	1	1
354	CICR283	Chr24	5	5	5	5	0	5	0	5	5	2	5	5	5	5	5	5	5	5	5	5	5	5	5	2	5	5	5	5	2	5	5	5	5	5	5	2	5	2	5	5	0	5	5	5	5	0	2
355	NAU4900	Chr24	5	5	5	5	5	5	5	5	5	5	5	5	5	5	5	5	5	5	0	5	5	5	5	5	5	5	5	5	5	5	5	5	5	5	5	5	5	5	2	2	5	5	5	5	5	5	5
356	CIR354	Chr24	1	1	1	1	1	1	1	1	1	1	1	1	3	1	1	1	1	1	1	1	1	1	1	1	1	1	1	1	1	1	1	1	1	1	1	1	1	1	1	2	1	1	1	1	1	1	1
357	DPL0068	Chr24	1	1	1	2	1	1	1	2	1	1	1	1	1	1	1	1	1	1	1	1	1	1	1	2	1	1	1	1	1	1	1	1	1	1	1	1	1	1	2	1	1	1	1	1	1	1	1
358	CICR204	Chr24	1	1	1	1	1	1	1	1	1	1	1	2	1	1	1	1	1	1	1	1	1	1	2	2	1	2	1	1	1	1	1	1	1	1	1	1	1	1	1	1	1	1	1	1	1	1	1
359	CICR673	Chr24	0	1	1	0	1	1	1	1	3	1	1	1	1	1	1	1	1	0	0	1	1	1	1	1	1	3	1	1	1	0	1	1	1	1	0	1	1	0	1	1	1	1	1	1	1	1	0
360	BNL2772	Chr24	1	1	1	1	1	1	1	1	1	1	1	1	1	1	1	1	1	1	1	1	1	1	1	1	1	2	1	1	1	1	1	1	1	1	1	1	1	1	2	1	2	1	1	1	1	1	1
361	NAU3010	Chr24	1	1	1	1	1	3	1	1	1	1	1	1	1	1	1	1	1	1	0	1	1	1	1	1	1	2	1	1	1	1	1	1	1	1	1	1	1	1	1	1	1	1	1	1	1	1	1
362	CICR223	Chr25	2	5	5	2	5	5	2	2	2	5	5	2	5	2	5	2	5	2	5	5	5	5	5	0	5	2	5	5	2	5	2	2	5	5	5	2	2	5	5	5	2	2	5	2	5	5	5
363	NAU2488	Chr25	1	1	1	1	1	1	1	1	1	1	1	1	1	1	1	1	1	1	1	1	1	1	1	1	1	4	1	1	1	1	1	1	1	4	1	1	1	1	1	1	1	1	1	1	1	1	1
364	BNL3190	Chr25	5	5	5	5	5	5	5	5	5	5	5	5	5	2	5	5	5	5	5	5	5	5	5	5	5	5	5	5	5	5	5	5	2	5	5	5	5	5	5	5	5	5	5	5	5	5	5
365	NTU191	Chr25	1	1	1	1	1	1	1	1	1	1	1	1	1	2	1	1	1	1	1	1	1	1	1	2	1	1	1	1	1	1	1	1	1	1	1	2	2	1	1	1	1	1	1	1	1	1	2
366	CICR556	Chr25	1	1	1	0	1	1	1	1	1	2	1	1	1	1	1	1	1	1	1	1	1	1	3	1	1	2	1	1	3	1	1	1	1	1	1	1	1	1	1	1	1	1	0	0	0	0	1
367	CICR161	Chr25	2	2	2	2	2	2	2	2	2	2	2	2	2	2	2	2	2	2	2	2	2	2	2	2	2	5	2	2	2	2	2	2	2	2	2	2	5	2	2	2	2	2	2	2	2	2	2
368	BNL3264	Chr25	1	1	1	1	1	1	1	1	1	1	1	1	1	1	1	1	4	1	0	1	1	0	1	1	1	1	1	1	1	1	0	1	1	4	4	1	0	1	1	1	1	1	1	1	1	1	1
369	CICR313	Chr25	1	1	1	1	1	1	1	1	1	1	1	3	1	1	1	1	1	1	1	1	1	1	1	2	1	1	1	1	1	1	1	1	1	1	1	1	1	1	1	1	1	1	1	1	1	1	1
370	NAU5373	Chr25	2	3	1	2	1	1	3	1	1	1	1	3	1	1	1	1	1	1	1	1	1	1	1	2	1	1	1	1	1	1	1	1	1	1	1	1	1	1	1	1	1	1	1	1	1	1	1
371	BNL1163	Chr25	4	1	1	4	4	1	1	1	1	1	1	1	4	1	1	1	1	1	1	1	1	4	1	1	1	4	4	1	1	1	1	4	1	1	1	1	1	1	1	1	1	1	1	1	1	1	1
372	DPL0520	Chr25	1	1	1	1	1	4	1	1	1	1	1	1	1	1	1	1	1	1	1	1	1	1	1	1	1	1	1	1	1	1	1	1	4	1	1	1	1	1	1	1	1	1	1	1	1	4	1
373	CICR323	Chr26	1	1	1	1	1	1	1	2	2	1	1	1	1	1	1	1	1	1	1	1	1	1	1	2	2	1	1	1	1	1	1	1	1	1	1	1	1	1	1	1	1	1	1	1	1	1	1
374	NAU3862	Chr26	1	1	2	1	1	1	1	1	1	1	2	3	1	1	3	1	2	1	2	2	2	3	1	1	2	1	2	1	1	2	2	2	2	2	3	1	1	1	3	1	1	1	3	1	1	2	1
375	NTU174b	Chr26	5	5	5	5	5	5	5	5	5	5	5	5	5	5	5	5	5	5	5	5	5	5	2	5	0	5	5	5	5	5	5	5	2	5	5	5	5	0	0	5	5	5	5	5	5	5	5
376	CICR423	Chr26	1	1	1	1	1	1	1	1	1	1	1	1	1	1	1	1	1	1	1	1	1	2	1	1	1	1	1	1	1	1	1	1	1	1	1	1	1	1	1	1	1	1	1	1	1	1	1
377	CICR050	Chr26	5	5	5	5	5	5	5	5	5	5	5	5	5	5	5	5	5	5	5	5	5	5	5	5	5	5	5	5	5	5	5	5	5	5	5	5	5	5	2	2	2	2	2	5	2	2	5
378	DPL0866	Chr26	1	1	1	3	1	1	1	1	1	1	1	1	1	1	1	1	1	1	1	1	1	1	1	1	1	1	1	1	1	1	1	1	1	1	1	1	1	1	1	1	1	1	1	1	1	1	1
379	MUSB0846	Chr26	1	1	1	1	1	1	1	1	1	0	0	1	1	1	1	1	1	0	1	0	0	0	1	1	1	1	1	1	1	1	0	1	1	1	0	1	1	2	1	1	1	1	1	0	1	1	1
380	MUSB1155	Chr26	5	5	5	5	5	5	5	5	5	2	2	5	5	5	5	2	5	5	5	5	5	5	5	5	5	5	5	5	5	5	5	5	2	5	5	5	5	5	5	5	5	5	5	5	5	5	5
381	CICR001	Chr26	1	1	1	1	1	1	1	4	4	1	1	1	1	1	1	4	1	1	1	1	1	1	1	1	1	1	1	0	1	1	1	1	0	1	1	1	1	1	1	1	1	1	1	1	1	4	1
382	CICR201	Chr26	5	5	2	5	2	2	2	5	2	5	5	5	5	5	2	5	5	5	5	5	5	5	2	5	5	5	5	5	5	5	2	2	5	5	5	5	5	5	2	5	5	2	5	5	2	0	0
383	CICR896	Chr26	1	1	1	1	1	1	1	1	1	1	1	1	1	1	1	1	1	1	1	4	4	1	1	1	4	1	4	1	1	4	1	1	1	1	1	1	1	1	1	1	1	1	1	1	1	1	1
384	BNL341	Chr26	5	5	5	5	2	5	5	5	5	5	5	5	5	5	5	5	5	5	5	5	5	0	5	5	5	5	5	5	5	5	5	5	5	5	5	5	5	5	5	5	5	5	5	5	5	5	5
385	NTU214	Chr26	1	1	1	1	1	1	1	1	1	1	1	1	1	1	1	1	1	1	1	1	1	1	1	1	1	1	1	1	1	1	1	1	1	1	1	1	1	1	1	1	1	1	1	1	1	1	1
386	BNL2725	Chr26	1	1	1	1	1	1	1	1	1	1	1	1	1	1	1	1	1	1	1	1	1	1	1	1	1	1	1	2	1	1	1	1	1	1	1	1	1	1	1	1	1	2	1	1	1	1	1
387	CIR293	Chr26	1	1	1	1	1	1	1	1	1	0	0	1	1	1	1	1	1	1	0	1	1	1	0	1	1	1	1	2	1	1	0	1	1	1	1	1	1	0	1	1	1	1	1	1	1	1	1
388	STV122	Chr26	1	1	1	1	1	1	1	1	1	1	1	1	1	1	1	1	1	1	1	1	1	1	1	1	1	1	1	2	1	1	1	1	1	1	1	1	1	1	1	1	1	1	1	1	1	1	1
389	NAU2640	Chr26	1	1	1	1	1	1	1	1	1	1	1	1	1	1	1	1	1	1	0	1	1	1	1	1	1	1	1	2	1	1	1	1	1	1	1	1	1	1	1	1	1	1	1	1	1	1	1
390	NAU3860	Chr26	1	1	1	1	1	1	1	1	1	1	1	1	1	1	1	1	1	1	1	3	1	1	1	1	2	1	2	2	1	2	1	1	1	1	1	1	1	1	1	1	1	1	1	0	1	1	1
[truncated: 18 more columns]

## Sheet: phenotype data
Trait	IL1	IL2	IL3	IL4	IL5	IL6	IL7	IL8	IL9	IL11	IL12	IL13	IL14	IL15	IL16	IL17	IL18	IL19	IL20	IL21	IL22	IL23	IL24	IL25	IL26	IL27	IL28	IL29	IL30	IL31	IL32	IL33	IL35	IL36	IL37	IL38	IL39	IL40	IL41	IL42	IL43	IL44	IL45	IL46	IL47	IL48	IL49	IL50	IL51
UHM11	29.68	28.815	30.85	28.68	28.9	32.4	29.09	30.98	32.04	32.045	29.845	26.36	29.485	31.865	30.2	32	29.65	28.515	30.365	29.165	29.945	29.48	28.835	29.755	28.435	26.64	28.855	31.05	30.53	29.19	31.76	30.61	-	29.145	30.555	30.59	29.08	28.86	29.485	28.55	30.55	30.35	30.395	31.45	29.915	30.84	29.86	28.24	30.11
UHM12	30.9	29.325	31.34	31.09	33.535	32.835	32.15	32.165	35.94	-	32.205	29.4	31.87	35.17	31.145	32.55	32.02	30.28	31.96	33.37	30.865	-	-	30.6	-	-	30.855	-	-	31.845	33.535	-	30.85	29.22	32.36	31.51	32.615	-	32.54	-	31.415	-	32.13	32.275	30.265	32.1	-	-	30.965
UHM13	27.69	28.82	27.215	28.02	30.84	-	-	29.81	31.95	-	30.935	-	32.2	-	27.82	-	28.81	-	-	30.28	28.455	-	29.36	-	25.21	27.05	29.165	28.655	-	29.425	30.525	28.92	29.385	28.7	-	-	29.46	-	29.45	-	28.185	-	26.57	29.12	-	27.99	29.73	-	28.795
STR11	30.1	29.5	31.5	29.7	30.65	32.15	30.95	33.95	34.25	30.8	32.05	29.25	33.05	34.15	30.05	36.2	29.8	30.5	32.45	30.7	32.45	30.6	28.65	34.55	29.65	28.55	30.85	34.45	27.8	29.1	35	34.2	-	31.9	30.85	35.5	33.3	33.8	31.6	31	34.45	33.8	32.8	33.95	32.25	29.2	30.8	30.6	31.25
STR12	32.45	29.15	30.5	29.6	32.1	33.2	30.5	33.8	41.3	-	33.05	37.6	31.95	36.8	32.5	37.8	31.6	35.5	32.7	33.85	33.25	-	-	35.7	-	-	33.45	-	-	36.25	35.25	-	33.4	31.8	35.6	31.8	32.25	-	32.4	-	33.55	-	32.75	31.4	34.05	32.5	-	-	33.05
STR13	27.7	27.6	28.2	28.8	30.75	-	-	30.8	37.9	-	32.85	-	32.3	-	28.75	-	29.35	-	-	31.8	29.35	-	28.8	-	28	27.8	28.9	30.15	-	29.65	29.85	30.1	29.15	30.6	-	-	27.9	-	29	-	30.1	-	25.5	30.1	-	28.1	33.2	-	28
MIC11	3.72	4.285	3.305	3.975	3.725	2.465	3.865	3.98	3.555	2.71	4.43	2.495	3.775	3.31	3.295	4.055	3.535	3.935	3.65	3.48	3.915	4.16	2.345	3.42	3.655	4.145	3.825	3.445	2.54	3.15	4.1	4.08	-	4.47	3.755	3.765	3.12	3.68	4.47	3.19	3.985	4.395	4.27	3.815	4.28	2.57	3.23	4.375	4.095
MIC12	5.285	5.595	4.885	5.05	4.61	4.725	4.74	5.04	4.14	-	5.145	3.9	5	3.9	5.235	3.95	4.865	4.8	4.77	4.26	4.52	-	-	3.5	-	-	4.6	-	-	4.65	4.975	-	3.36	5.17	5.04	4.915	5.18	-	4.95	-	4.81	-	4.97	5.39	4.9	5.09	-	-	5.4
MIC13	4.42	5.12	4.135	4.51	4.67	-	-	5.04	4.27	-	4.82	-	4.46	-	4.77	-	4.835	-	-	4.16	4.69	-	5.34	-	5.74	5.5	4.705	4.635	-	5	5.155	4.71	4.77	4.96	-	-	5.14	-	5.35	-	4.495	-	5.08	5.14	-	5.27	5.37	-	5.18
UI11	84.25	83.65	83.75	82.25	84.9	83.9	84.45	84.65	84.75	82.1	84.4	83.1	84.35	84	82.45	85	82.85	83.55	85.55	82.5	83.85	83.7	82.45	84.4	82.8	83	84.85	83.75	80.8	83.9	84.5	85.6	-	83.9	83.35	84.35	84	83.3	85.6	82.2	85.45	84	83.9	83.85	83.45	80.8	81.8	82.35	85
UI12	85.95	86.15	85.3	85.25	86.4	86.05	85.1	86.45	87.8	-	85.5	85	84.35	86.3	86.05	86.5	85.55	87.6	84.85	84.2	86	-	-	86.5	-	-	85.15	-	-	87.25	85	-	84.55	84.75	86.1	85.75	86.1	-	84.95	-	86.1	-	87.55	84.85	86.4	84.8	-	-	85.85
UI13	81.1	81.4	82.2	85.1	84.55	-	-	86.5	86.2	-	86.35	-	85.7	-	83.85	-	84.35	-	-	84.5	82.85	-	83.6	-	82.9	81.4	85.1	83.95	-	85.05	83.7	83.8	81.45	82.6	-	-	82.9	-	84.9	-	84	-	82.2	85.1	-	84.8	87.4	-	82.95
ELO11	6.4	6.15	6.1	6.25	6.2	6.5	6	5.7	6.05	6.65	6.1	7.1	6.35	6.2	6.65	5.8	6.6	6.6	6.4	6.5	6.2	6.7	7.4	6.5	6.75	6.8	6.3	6.15	7.4	6.85	6.1	6.1	-	6.2	6.4	5.9	6.6	6.2	6.1	6.8	5.9	6.05	6.1	5.9	6.25	6.9	6.65	6.6	6.25
ELO13	6.4	6.45	6.45	6.4	5.85	-	-	6.1	5.9	-	6.1	-	6.2	-	6.45	-	6.15	-	-	6.3	6.45	-	6.1	-	6.6	6.5	6.35	6.2	-	6.3	6.5	6.4	6.4	6.4	-	-	6.4	-	6.4	-	6.4	-	6.8	6.4	-	6.6	6.1	-	6.5
Note: Upper-half mean length of fiber (UHM); fiber strength (STR); fiber micronaire (MIC); fiber elongation (ELO); fiber uniformity index (UI); short fiber content (SFC). The number of 11,12,13 in the trait name means that the trait was collected in Year 2011, 2012, and 2013 respectively.
[truncated: 16 more columns]
